# New MicroRNAs in *Drosophila*—Birth, Death and Cycles of Adaptive Evolution

Yang Lyu<sup>1,2,3</sup>, Yang Shen<sup>1,2,3</sup>, Heng Li<sup>1,2,3</sup>, Yuxin Chen<sup>1,2,3</sup>, Li Guo<sup>1,2,3</sup>, Yixin Zhao<sup>1,2,3</sup>, Eric Hungate<sup>4</sup>, Suhua Shi<sup>1,2,3</sup>, Chung-I Wu<sup>1,2,3,4,5\*</sup>, Tian Tang<sup>1,2,3\*</sup>

**1** State Key Laboratory of Biocontrol, Key Laboratory of Gene Engineering of the Ministry of Education, School of Life Sciences, Sun Yat-sen University, Guangzhou, Guangdong, China, **2** Guangdong Key Laboratory of Plant Resources, School of Life Sciences, Sun Yat-sen University, Guangzhou, Guangdong, China, **3** Key Laboratory of Biodiversity Dynamics and Conservation of Guangdong Higher Education Institutes, Sun Yat-sen University, Guangzhou, Guangdong, China, **4** Department of Ecology and Evolution, University of Chicago, Chicago, Illinois, United States of America, **5** Beijing Institute of Genomics, Chinese Academy of Sciences, Beijing, China

## Abstract

The origin and evolution of new microRNAs (miRNAs) is important because they can impact the transcriptome broadly. As miRNAs can potentially emerge constantly and rapidly, their rates of birth and evolution have been extensively debated. However, most new miRNAs identified appear not to be biologically significant. After an extensive search, we identified 12 new miRNAs that emerged *de novo* in *Drosophila melanogaster* in the last 4 million years (Myrs) and have been evolving adaptively. Unexpectedly, even though they are adaptively evolving at birth, more than 94% of such new miRNAs disappear over time. They provide selective advantages, but only for a transient evolutionary period. After 30 Myrs, all surviving miRNAs make the transition from the adaptive phase of rapid evolution to the conservative phase of slow evolution, apparently becoming integrated into the transcriptional network. During this transition, the expression shifts from being tissue-specific, predominantly in testes and larval brain/gonads/imaginal discs, to a broader distribution in many other tissues. Interestingly, a measurable fraction (20–30%) of these conservatively evolving miRNAs experience “evolutionary rejuvenation” and begin to evolve rapidly again. These rejuvenated miRNAs then start another cycle of adaptive – conservative evolution. In conclusion, the selective advantages driving evolution of miRNAs are themselves evolving, and sometimes changing direction, which highlights the regulatory roles of miRNAs.

**Citation:** Lyu Y, Shen Y, Li H, Chen Y, Guo L, et al. (2014) New MicroRNAs in *Drosophila*—Birth, Death and Cycles of Adaptive Evolution. PLoS Genet 10(11): e1004096. doi:10.1371/journal.pgen.1004096

**Editor:** Harmit S. Malik, Fred Hutchinson Cancer Research Center, United States of America

**Received:** November 27, 2012; **Accepted:** November 23, 2013; **Published:** January 23, 2014

**Copyright:** © 2014 Lyu et al. This is an open-access article distributed under the terms of the Creative Commons Attribution License, which permits unrestricted use, distribution, and reproduction in any medium, provided the original author and source are credited.

**Funding:** This work was supported by National Science Foundation of China (31130069, 91231117, 31170308, 41130208, and 31200945), Science Foundation of the State Key Laboratory of Biocontrol (SKLBC10B01 and SKLBC2011A01), and Pearl River Science and Technology Foundation of Guangzhou (2012J2200022). The funders had no role in study design, data collection and analysis, decision to publish, or preparation of the manuscript.

**Competing Interests:** The authors have declared that no competing interests exist.

\* E-mail: ciwu@uchicago.edu (CIW); lsstt@mail.sysu.edu.cn (TT)

## Introduction

MicroRNAs (miRNAs) are a class of small, endogenous RNAs that regulate gene expression post-transcriptionally [1,2]. Each miRNA gene is first transcribed as a stem-loop (hairpin) RNA structure, 70–90 nt in length in animals, and then processed in several steps into the ~22-nt mature product, referred to as miR [3]. In animals, miR binds to the 3′ untranslated region (UTR) of target mRNAs through perfect base-pairing of the seed region (position 2–8 of a miR), inducing translation repression or mRNA degradation [4]. As the seed is only 7 nt long, each miRNA may potentially regulate hundreds of transcripts while each transcript may in turn be regulated by more than one miRNA [5].

The emergence of new miRNAs is of special interest in evolutionary biology for two reasons. First, they buffer gene expression noises and thus have been hypothesized to be a key player in canalization [6,7]. As proposed by C. H. Waddington [8,9], canalization contributes to developmental stability and, in a recent interpretation, it may also contribute to evolvability via hidden genetic variations [10,11]. Second, due to their small size, miR-producing hairpins can form readily and *de novo* emergence of miRNAs from non-miRNA transcripts is a frequent phenomenon

[12,13]. There are hundreds of thousands of potential miRNA structures in each *Drosophila* genome [12] and millions in a mammalian genome [14]. Given such a propensity for new miRNAs to emerge, the birth, death and adaptation of new miRNAs are a significant part of understanding the evolution of transcriptional regulation [12]. In contrast, protein-coding genes require long open reading frames to yield functional peptides. Hence, local duplication or retrotransposition [15], rather than *de novo* origination, is the common mode for the formation of coding genes.

In *Drosophila*, the birth and death rates of miRNAs have been estimated to be about 12 and 11.7 genes per Myr, respectively, with a net gain of about 0.3 per Myr [12]. It is generally agreed that the net gain is low, ranging between 0.3 and 1 new gene per Myr [16,17]. Despite this, the total repertoire of miRNAs should still be increasing dramatically over long periods. While the net gain (birth – death) is not in dispute, there is disagreement over the estimated birth and death rates of new miRNAs [12,16,17]. Because numerous putative miRNAs are found in the transcriptome, these lowly expressed, evolutionarily neutral, and short-lived miRNAs account for the bulk of the estimated births and deaths. The debate is about which ones should be counted as new miRNAs.

## Author Summary

During Metazoan evolution, the architecture of the genome changed dramatically in size, gene number and regulatory elements. Genomic architecture is often assumed to be correlated with morphological complexity. However, it is still not known whether the gene repertoire, both for protein coding and non-coding genes, is continually increasing. In the last decade, a large family of small non-coding RNAs, or microRNAs (miRNAs), has been shown to play an important role in diverse developmental processes. The genes controlled by miRNAs often evolve rapidly, potentially contributing to functional novelty, diversity and speciation. Here we estimated the birth and death rate of new adaptive miRNAs in *Drosophila melanogaster*. We found most new adaptive miRNAs disappear over long periods of time; hence, the miRNA repertoire stays close to that of a steady state. This steady state is commensurate with the morphological constancy of the genus of *Drosophila*.

To resolve the issue, we propose to define new miRNAs in an evolutionary context by a set of stringent criteria, requiring a signature of initial adaptive evolution soon after their birth. Numerous small RNAs that emerge and vanish with the dynamics of neutral sequences are excluded from the evolutionary analysis. Given this definition, only a small fraction of miRNA-like sequences in any species would qualify as new miRNAs. We collected extensive small RNA-seq data available for four *Drosophila* species (*D. melanogaster*, *D. simulans*, *D. pseudoobscura* and *D. virilis*) [12,16,18–23] and three mosquitoes (*Aedes albopictus*, *Aedes aegypti* and *Culex quinquefasciatus*) [24,25]. We further generated small RNA-seq data for sex organs and imaginal discs in *D. simulans* and *D. pseudoobscura*. The extensive dataset permits systematic identification of new miRNAs and in-depth analyses of their long-term fates.

Our first objective is to understand the origin and early evolution of new miRNAs in the species *D. melanogaster*. The second objective is to track the long-term evolutionary trajectory of new miRNAs, which may be in any of the following four modes after their initial adaptive evolution:

- 1) Evolving rapidly, driven by positive selection;
- 2) Transitioning between the initial adaptive phase and one of the two possible outcomes given below in 3) and 4). miRNAs in this phase may appear neutrally evolving;
- 3) Evolving conservatively and slowly after being assimilated into the transcriptional network;
- 4) Effectively dead after its structure degenerates and is no longer recognizable as an miRNA.

## Results

From the *D. melanogaster* miRNA repository (miRBase Release 19.0, Ref. [26]), 238 miRNA genes, including 204 canonical miRNAs and 34 mirtrons, were evaluated for their expression levels by examining small RNA sequencing data from different tissues and developmental stages (Ref. [12,16,18–21,23], see **Table S1** and **Materials and Methods**). The phylogenetic distributions of the 238 miRNA genes in *Drosophila* (*D. melanogaster*, *D. simulans*, *D. pseudoobscura* and *D. virilis*), with mosquitoes (*Aedes albopictus*, *A. aegypti* and *Culex quinquefasciatus*) as the outgroup, were determined from the available small RNA libraries (Ref.

**Table 1.** Number of miRNAs in the genome of *D. melanogaster* in different age groups.

| type                   | expression level | age (Myrs) |      |       |        |      |
|------------------------|------------------|------------|------|-------|--------|------|
|                        |                  | 0–4        | 4–30 | 30–60 | 60–250 | >250 |
| canonical<br>(n = 204) | >200 RPM         | 12         | 10   | 9     | 34     | 71   |
|                        | ≤200 RPM         | 60         | 2    | 3     | 3      | 0    |
| mirtrons<br>(n = 34)   | >200 RPM         | 3          | 2    | 1     | 3      | 0    |
|                        | ≤200 RPM         | 21         | 3    | 1     | 0      | 0    |

doi:10.1371/journal.pgen.1004096.t001

[12,16,22,24,25], see **Table S1** and **Materials and Methods**). In addition, we sequenced five additional libraries from *D. simulans* and *D. pseudoobscura* to ensure that all *Drosophila* species in this survey included samples from testes and ovaries. Genes represented by more than 200 reads per million (RPM) in at least one library were designated “highly expressed” (**Table S2**). The rest were denoted as “lowly expressed” miRNAs.

The 204 canonical miRNAs and 34 mirtrons have very different patterns in age and expression level. **Table 1** shows the emergence time of each miRNA, which falls in the interval of 0–4, 4–30, 30–60, 60–250, and >250 Myrs before present as depicted in **Fig. 1**. More than half of the highly expressed, canonical miRNAs (71 out of 136) came from the oldest age group (>250 Myrs) but none of the mirtrons were from that group (**Table 1**), suggesting mirtrons contribute very little to miRNA repertoire over long periods of time. The result is consistent with previous findings that mirtrons have different evolutionary trajectories from canonical miRNAs [16]. The majority of the lowly expressed genes, both canonical miRNAs (60/68) and mirtrons (21/25), came from the young age group of 0–4 Myrs (**Table 1**), corroborating that lowly expressed miRNA genes are likely to be evolutionarily transient [12].

In this study, we will focus on the 136 highly expressed canonical miRNAs because, with respect to long-term evolution, they are the most significant class among the four categories of **Table 1**.

### I. Birth of new miRNAs

Starting with the youngest genes, we first analyzed the 22 new miRNA genes that emerged in the last 30 Myrs, since *D. melanogaster* diverged from *D. pseudoobscura* (**Fig. 1**). Among them, 21 originated *de novo*; only miR-983-2 in *D. melanogaster* (dme-miR-983-2) was duplicated from another miRNA (dme-miR-983-1). More than half of the 22 new miRNAs are found in clusters – five in the miR-972 cluster (abridged as miR-972s), two in miR-310s and five in miR-982s. Members in a cluster have significantly higher expression levels than the orphan miRNAs (Mann-Whitney U test,  $p < 0.05$ ). The miR-982 cluster consists only of members emerging in the last 30 Myrs, whereas both miR-310s and miR-972s are mixtures of old and new miRNAs (**Table S3**). Thus, the former is most informative about the birth and early evolution of new miRNAs.

The miR-982s is X-linked, comprising five distinct miRNA families: miR-982, -2582, -303, -983 and -984. With the exception of the recently duplicated dme-miR-983-1/-2, miRNAs in this cluster do not share a seed sequence (**Fig. 2A & B**). Against the 12 *Drosophila* species [27], copies of this cluster can be found in *D. simulans*, *D. sechellia*, *D. yakuba* and *D. erecta* but are absent in all

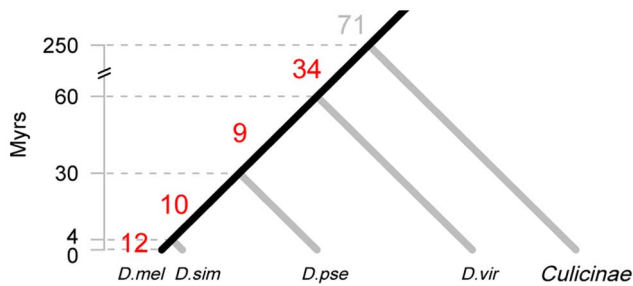

**Figure 1. Origin of new miRNAs at different evolutionary periods.** The divergence time of the phylogeny is based on the *Drosophila* 12 Genomes [27], Gaunt *et al.* [65] and Bolshakov *et al.* [66]. The number of highly expressed, canonical miRNAs that are inferred to originate in each time interval is given on the corresponding branch. Species abbreviations: *D. mel*, *D. melanogaster*; *D. sim*, *D. simulans*; *D. pse*, *D. pseudoobscura*; *D. vir*, *D. virilis*. The 12 miRNAs of the last 4 Myrs are miR-979 and miR-4966 from the miR-972s cluster, miR-983-2 and miR-984 from the miR-982s cluster, miR-954, miR-956, miR-971, miR-985, miR-990, miR-997, miR-1017 and miR-2279. The ten miRNAs emerged between 4 and 30 Myrs ago are miR-972, miR-978 and miR-2499 from the miR-972s cluster, miR-303, miR-982 and miR-983-1 from the miR-982s cluster, miR-992 and miR-2498 from the miR-310s cluster, miR-1001 and miR-2494.  
doi:10.1371/journal.pgen.1004096.g001

other more distantly related species. The expression of miR-982s members was confirmed by RT-PCR (Fig. S1). The evolution of this cluster in the *D. melanogaster* subgroup is depicted in detail in Fig. 2A.

As shown in Fig. 2A, each member of miR-982s appears to emerge *in situ* from local non-miRNA sequences. Due to their small sizes, unstructured genomic sequences evolving into miRNA-like transcripts have often been suggested [28] but have not been convincingly proven. The cluster of miR-982/2582/303/983/984 appears to be a good example of *de novo* origin (see below) with point mutations improving miRNA processing step by step (Fig. 2B and Fig. S2 and S3). For example, the secondary structure of miR-982 in *D. erecta* can only form a poor hairpin (−18.20 kcal/mol). Many nucleotide substitutions, accumulated subsequently in the stem and loop regions, have greatly improved the thermodynamic stability of the hairpin in *D. melanogaster* (−24.00 kcal/mol) and in the three paralogs of *D. simulans* (−21.52 to −27.50 kcal/mol; Fig. 3A and Fig. S2 and S3).

After each miRNA emerges from the unstructured sequence, gene duplication appears common [29,30]. miR-2582 and miR-982 were expanded by whole-gene (Fig. 2A, Duplication 1, 2 and 3) or segment duplication (Duplication 4) in *D. melanogaster* and *D. simulans*, followed by gene conversion in *D. sechellia* (Fig. 2A). Moreover, miR-983 was duplicated in *D. melanogaster* (Duplication 5). In this species alone, miR-984 emerged *de novo* next to miR-983 (Fig. 2A).

These duplicates soon accumulated many nucleotide substitutions (Fig. 2B). Meanwhile, seed shifting and arm switching occurred in the miR-982/2582/303/983 families (Fig. 2B). These modifications presumably lead to new targets, resulting in neo-functionalization after gene duplication [28].

## II. Early adaptive evolution of new miRNAs

After new miRNAs emerged *de novo*, the question is whether the subsequent evolution is driven by natural selection. A greater level of divergence in miRNA genes than in flanking regions might suggest positive selection (Ref. [31]; Fig. S4A). A proper analysis would require the comparison of between-species divergence (D)

and within-species polymorphism (P) using a modified McDonald-Kreitman (MK) test [32].

In this study, we generated DNA sequences from 42 *D. melanogaster* (~7.5 kb from each line) and 25 *D. simulans* lines (~8.1 kb) (Table S4). The D/P ratios for each precursor miRNA from miR-982s, as well as the 1 kb upstream flanking regions, were compared [33]. As shown in Table 2, all the miRNA genes from the miR-982, miR-303 and miR-983 families have a significantly higher D/P ratio than the flanking regions in both *D. melanogaster* and *D. simulans* ( $p < 0.05$ ), suggesting positive selection. Members of the miR-2582 family show significantly higher D/P ratios in *D. melanogaster*, but not in *D. simulans* (Table 2, also see next section).

Because each individual miRNA gene, being small, would yield a significant result in the MK test only when the selection is extremely strong, we also performed the test on new miRNAs collectively, relative to the genome-wide 4-fold degenerate sites (from *Drosophila* Population Genomics Project (DPGP); see Materials and Methods). Table 3 shows that the new miRNAs emerging in the last 30 Myrs have a higher D/P ratio than in the genome-wide 4-fold degenerate sites. In fact, more than 79% of the observed divergence in the precursors and more than 89% in the mature regions is estimated to have been fixed adaptively (see Materials and Methods and Table 3). A higher D/P ratio could also be attributed to an increase in selective constraint, rather than positive selection [34]. However, we excluded such possibility in Text S1. Due to the large number of adaptive sites, every new miRNA is likely to carry one or more of them. As expected, signatures of positive selection are much weaker for the lowly expressed miRNAs and mirtrons (Table S5).

Other lines of evidence for recent adaptive evolution include the pattern of polymorphism within species and the differentiation between populations. The miR-982 cluster was examined further by the sliding window analysis of Fay and Wu's  $H$  ( $\theta_H$ ), an estimator of nucleotide diversity sensitive to positive selection [35,36]. The profile of  $\theta_H$  peaks near miR-983/984 and miR-303 in both species, a common footprint of hitchhiking with positive selection [35]. The signature is stronger in *D. simulans* for miR-982 than in *D. melanogaster* (Fig. S4B and S4C). In addition, we analyzed the M and Z populations of *D. melanogaster* [37–39] using the  $F_{st}$  statistic [40]. For dme-miR-984 and dme-miR-303, the precursor sequences are strongly differentiated between M and Z lines ( $F_{st} = 0.318$  for dme-miR-984 and  $F_{st} = 0.252$  for dme-miR-303) compared to all SNPs within the miR-982s region (Mann-Whitney U test,  $p = 0.057$  for dme-miR-984 and  $p = 0.068$  for dme-miR-303, Table S6) or the 238 *D. melanogaster* miRNAs (Mann-Whitney U test,  $p = 0.046$  for dme-miR-984 and  $p = 0.008$  for dme-miR-303; data were obtained from DPGP2 [41], see Materials and Methods). The analyses collectively suggest that the rapid evolution of new miRNAs is driven by natural selection.

## III. Death vs. integration after the initial adaptive evolution

After the initial adaptive evolution, one might reasonably expect these new adaptive miRNAs to be integrated into the transcriptional network and begin evolving at a slower rate. Surprisingly, the most likely fate of these new miRNAs was death, rather than integration. This can be seen in the number of observable new miRNAs from two different time periods – 22 surviving miRNAs from the last 30 Myrs but only 9 from the preceding 30 Myrs (30–60 Myrs before present).

By assuming a constant birth rate, we can estimate the number of newborn miRNAs in each time interval, which can then be compared with the surviving miRNAs from that time period.



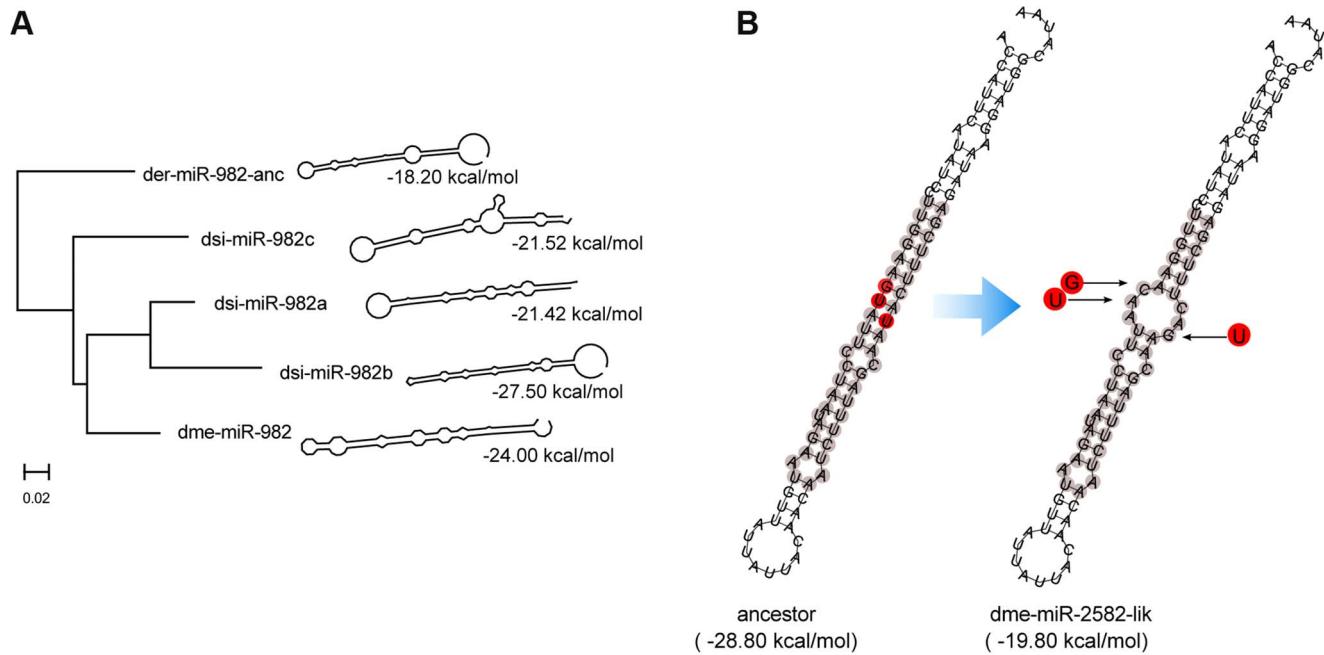

**Figure 3. Evolution of the secondary structure of members of miR-982s as predicted by RNAfold [70].** (A) The thermo-stability of each hairpin is shown as kcal/mole at the tip of the branch. The phylogenetic tree is reconstructed based on the precursor sequences by the maximum likelihood method. (B) Disruption of dme-miR-2582-like hairpin structure by point mutations. Red nucleotide bases are the three lineage-specific mutations that disrupted the duplex. Gray nucleotide bases are the consensus miR:miR\* duplex of miR-2582 inferred from dsi-miR-2582a/b. doi:10.1371/journal.pgen.1004096.g003

**Table 2.** The McDonald-Kreitman test on individual miRNAs of the miR-982s cluster.

| miRNA                      | D  | P  | D/P    | p-value <sup>d</sup>     |
|----------------------------|----|----|--------|--------------------------|
| <i>D.melanogaster</i>      |    |    |        |                          |
| dme-miR-982 <sup>a</sup>   | 14 | 0  | (n.a.) | $6.31 \times 10^{-5***}$ |
| dme-miR-303                | 15 | 4  | 3.750  | $7.89 \times 10^{-3**}$  |
| dme-miR-983                | 14 | 1  | 14.000 | $4.63 \times 10^{-4***}$ |
| dme-miR-2582-like          | 14 | 1  | 14.000 | $4.63 \times 10^{-4***}$ |
| Neighboring sites          | 31 | 38 | 0.816  |                          |
| <i>D.simulans</i>          |    |    |        |                          |
| dsi-miR-982c <sup>b</sup>  | 16 | 1  | 16.000 | 0.012 <sup>*</sup>       |
| dsi-miR-2582b <sup>c</sup> | 11 | 5  | 2.200  | 0.468                    |
| dsi-miR-982b <sup>b</sup>  | 19 | 3  | 6.333  | 0.042 <sup>*</sup>       |
| dsi-miR-2582a <sup>c</sup> | 11 | 6  | 1.833  | 0.579                    |
| dsi-miR-982a <sup>b</sup>  | 16 | 1  | 16.000 | 0.012 <sup>*</sup>       |
| dsi-miR-303                | 18 | 1  | 18.000 | $7.11 \times 10^{-3**}$  |
| dsi-miR-983                | 17 | 1  | 17.000 | $9.39 \times 10^{-3**}$  |
| neighboring sites          | 31 | 18 | 1.722  |                          |

D (for divergence) is the number of fixed differences between *D.melanogaster* and *D.simulans* and P is the number of polymorphic sites (P) within species.

<sup>a</sup>The consensus sequence of dsi-miR-982a/b/c is used as the outgroup of dme-miR-982.

<sup>b</sup>dme-miR-982 is used as the outgroup of dsi-miR-982a/b/c.

<sup>c</sup>dme-miR-2582-like is used as the outgroup of dsi-miR-2582a/b.

<sup>d</sup>Fisher's exact test was performed against neighboring site.

<sup>\*</sup>,  $p < 0.05$ ;

<sup>\*\*</sup>,  $p < 0.01$ ;

<sup>\*\*\*</sup>,  $p < 0.001$ .

doi:10.1371/journal.pgen.1004096.t002

of them should have been recognizable as homologs between *D. melanogaster* and *D. virilis*.

We suggest that the 8 unusual miRNAs may have been conservatively evolving for most of their evolutionary history. Four of them have been adaptively evolving once again and the remaining four appear to be in transition, away from the previous selective constraints. If the hypothesis is correct, we expect to see stronger evolutionary conservation in more distant comparisons than in recent ones. We use  $K_{miR}/K_S$ , where  $K_{miR}$  denotes the divergence in the precursor region of the miRNA, to measure conservation. **Table 4** shows their  $K_{miR}/K_S$  values for the last 4 Myrs and for the distant past (60 Myrs after the split between *D. melanogaster* and *D. virilis*). The evolutionary conservation has indeed been relaxed substantially in the last 4 Myrs with the average value increasing from 0.337 to 0.825, a 2.5-fold difference. Such fold-changes of  $K_{miR}/K_S$  were significantly high in the eight miRNAs, compared with the whole repertoire of 238 miRNAs (Mann-Whitney U test,  $p = 0.00014$ ). The rate increase appears to be true in both *D. melanogaster* and *D. simulans* lineages when the homologous sequences from *D. yakuba* and *D. erecta* were used as outgroups to calculate the rate in each lineage separately. Among the eight genes, two and six are evolving slightly faster in *D. melanogaster* and *D. simulans*, respectively (see **Table S7**). It is interesting that some old miRNAs go through the reverse transition (or rejuvenation) from conservative to adaptive evolution, the latter being the hallmark of young miRNAs.

Rejuvenation can also lead to the death of old miRNAs. The miR-972s may be such an example. Some members of this cluster emerged 60–250 Myrs ago and should have been integrated into the ancestral genome by the time *D. pseudoobscura* split from *D. melanogaster*. However, the entire miR-972s region was lost in *D. pseudoobscura* since the split.

**Table 3.** The McDonald-Kreitman test on the entire group of miRNAs of the same age.

| site type               | site number | D       | P       | P <sub>DAF&gt;5%</sub> | D/P <sub>DAF&gt;5%</sub> | MK test $\rho$ -value <sup>a</sup> | $\alpha^b$ (% of adaptive fixations) |
|-------------------------|-------------|---------|---------|------------------------|--------------------------|------------------------------------|--------------------------------------|
| 4-fold degenerate sites | 3,495,672   | 378,361 | 168,979 | 83,996                 | 4.50                     | -                                  | -                                    |
| 0–4 Myrs                |             |         |         |                        |                          |                                    |                                      |
| precursor               | 1,118       | 86      | 8       | 4                      | 21.50                    | 1.1e-4                             | 79.1                                 |
| mature                  | 196         | 18      | 0       | 0                      | Inf.                     | 2.7e-2                             | 100.0                                |
| 4–30 Myrs               |             |         |         |                        |                          |                                    |                                      |
| precursor               | 944         | 110     | 9       | 3                      | 36.67                    | 4.2e-7                             | 84.7                                 |
| mature                  | 227         | 33      | 3       | 0                      | Inf.                     | 1.3e-3                             | 89.8                                 |
| 30–60 Myrs              |             |         |         |                        |                          |                                    |                                      |
| precursor               | 800         | 35      | 19      | 12                     | 2.92                     | >0.50                              | -38.9                                |
| mature                  | 201         | 9       | 4       | 3                      | 3.00                     | >0.50                              | -24.7                                |
| 60–250 Myrs             |             |         |         |                        |                          |                                    |                                      |
| precursor               | 2,839       | 110     | 37      | 14                     | 7.54                     | 2.6e-2                             | 36.0                                 |
| mature                  | 724         | 7       | 5       | 0                      | Inf.                     | 0.25                               | 19.6                                 |
| >250 Myrs               |             |         |         |                        |                          |                                    |                                      |
| precursor               | 6,335       | 72      | 60      | 18                     | 4.00                     | >0.50                              | -49.8                                |
| mature                  | 1,470       | 2       | 3       | 0                      | Inf.                     | >0.50                              | -68.8                                |

<sup>a</sup>One-tailed Fisher's exact test. To increase statistical power, we used polymorphisms with DAF>5% in the MK test [79].

<sup>b</sup> $\alpha$  was calculated using the methods described by Mackay *et al.* [75].

doi:10.1371/journal.pgen.1004096.t003

Taken together, new miRNAs (such as miR-310s and miR-972s) may go through cycles of adaptation, integration (if escaping death) and rejuvenation, which would start another cycle of adaptation and integration (**Fig. 4B**).

## V. Evolution of miRNA expression

To study the evolution of new miRNAs sequences, we characterized their expression patterns. We did so by using the global small RNA profiling datasets (see **Table S1** and **Materials and Methods**). **Figure 5** shows young miRNAs (<30 Myrs) are lowly expressed in specific tissues, generally in the testes and larval brain/gonads/imaginal discs. Middle-aged miRNAs (30–60 Myrs) broadened their expressions to include ovaries and embryos. The older miRNAs (60–250 Myrs) showed moderate and even broader expressions, which then evolved to become highly abundant in all tissues and developmental stages as seen in the oldest miRNAs (>250 Myrs). The simplest explanation is that new miRNAs increase the expression level and expand the breadth as they get older. The change in expression parallels that in sequence evolution (**Fig. 4A** and **Table S8**). There are other explanations that may also account for the different expression patterns between new and old miRNAs (see **Text S2**). Detailed descriptions of the evolution in expression patterns are given in **Text S3**.

## Discussion

During Metazoan evolution, the miRNA repertoire expanded dramatically from a few genes to several hundreds [28,42]. By limiting the analysis to new miRNAs that evolve adaptively soon after their birth, we avoided the large number of lowly expressed miRNA-like sequences. These sequences may or may not be considered miRNAs and are generally thought to be evolutionarily ephemeral and adaptively insignificant [43,44]. The inclusion of only new miRNAs that evolve adaptively at emergence reveals an unexpected pattern of an excess of such miRNAs in the last 4 million years of the *D. melanogaster* lineage. The possible explanations are therefore either a burst of birth since *D. melanogaster* split from *D. simulans*, or a decline in the survivorship of adaptive new miRNAs as they age.

We consider the latter explanation as more plausible for several reasons. First, the birth rate of miRNA-like sequences indeed appears constant because different *Drosophila* species have comparable numbers of such new transcripts [16]. Given the ease in forming precursor-like hairpins, the constant rate is hardly surprising. Second, as a result, the birth rate of adaptive new miRNAs may not deviate much from a constant value either. Indeed, the burst of adaptive new miRNAs is observable in *D. simulans* as well as the common ancestor of *D. melanogaster* and *D. simulans*, as is evident in the miR-982 cluster (**Fig. 2A**). Third, the proportion of adaptive miRNAs born in the period of 4–30 Myrs is also higher than that in the 30–60 Myrs period. Overall, an excess of new adaptive miRNAs appears to be a decreasing function of time, rather than of particular lineages; hence, their death over time is a simpler explanation.

Because only a small number of new adaptive miRNAs remain active after cycles of evolution through phases of adaptation and degeneration, the repertoire of miRNAs in the *D. melanogaster* genome has been nearly static in 40 Myrs of evolution, with only 0.18 miRNA integrations per Myrs. We should note that this low rate may still be an over-estimate because not all death has been accounted for. This (near) steady state echoes the view of a correlation between morphological complexity and the size of miRNA repertoire [45], as the *Drosophila* genus has been relatively invariant in form since its diversification.

Despite the low integration rate, many new miRNAs continue to emerge and some briefly evolve adaptively before their demise. This “transient utility” is puzzling as gene functions are lost usually through environmental changes (such as vision genes in caves [46]) or redundancies [47]. A possible explanation may be the suggested role of miRNAs in evolutionary canalization [7]. In such a role, the regulators and their targets need not be stringently wired as long as the system remains properly buffered. By this scheme, new miRNAs may emerge to fill in the transiently vacated role created by the shifting interactions between established miRNAs and their targets [7]. They disappear when the role is no longer needed.

A small number of new miRNAs that become integrated into the transcriptional network begin this process in the testis, in parallel with new protein coding genes [48–54]. Since sexual selection driving male reproduction is a very potent force of evolution, this expression pattern may not be all that surprising

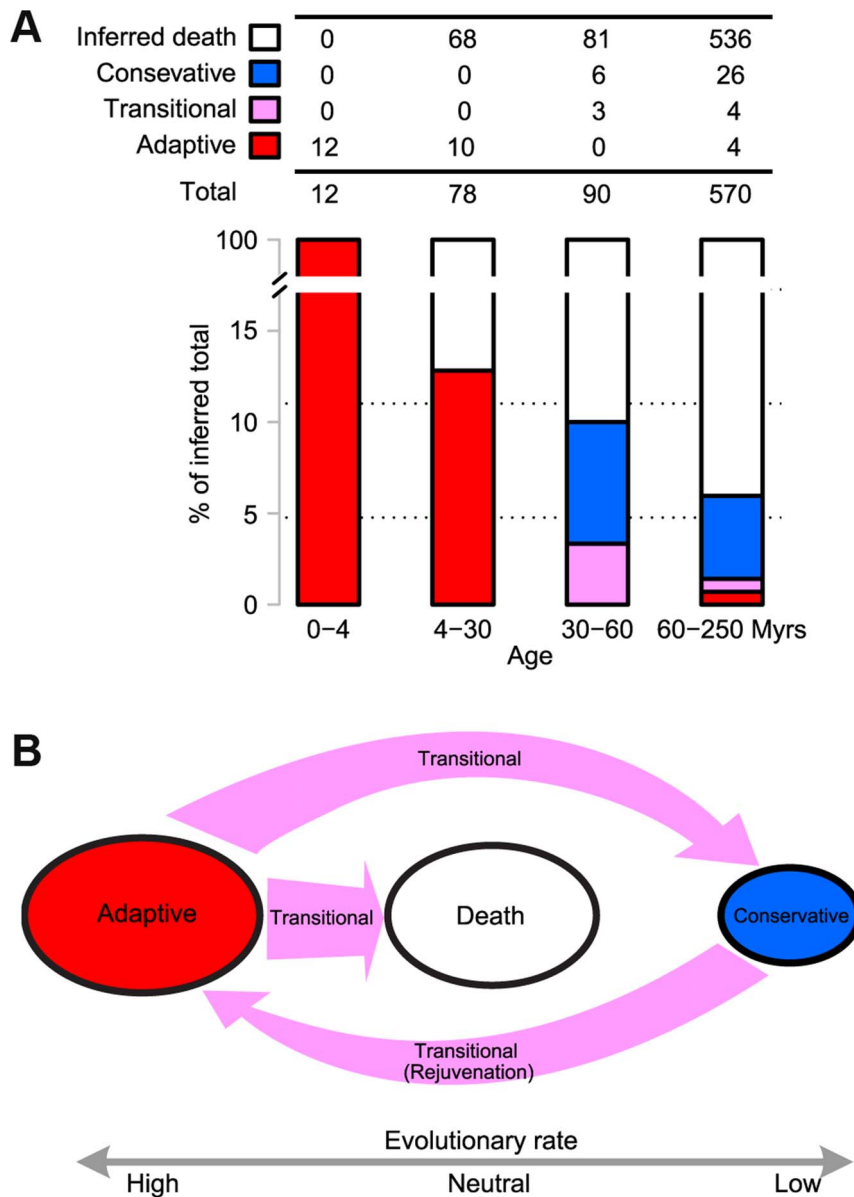

**Figure 4. (A) Evolutionary trajectories of miRNAs - The miRNAs were grouped by age as defined in Fig. 1.** The number of newborns in each time interval was estimated by assuming a constant birth rate obtained from the last 4 Myrs (3 miRNAs per Myr). The number of miRNA death was calculated by subtracting the observed number of surviving miRNAs from the inferred number of newborns (the birth rate multiplied by the time interval). The criteria for determining adaptive, conservative and transitional miRNAs are given in **Materials and Methods**. The number in each category is given in the table and the proportion is shown as a barplot. Note that the combined proportion of adaptive and transitional miRNAs, indicated in red and purple in the barplot, respectively, decreases chronologically. **(B) A model for the evolution of new miRNAs, which starts in the adaptive phase and ends in either death or in conservatism.** In the latter phase, they may be recycled back to the adaptive phase. The evolutionary rate in each phase is indicated below. Transitions between phases are shown by arrows, the sizes of which reflect the flux between phases.

doi:10.1371/journal.pgen.1004096.g004

[50,55–58]. In the example of miR-982s, the predicted targets are indeed enriched in genes of male courtship behavior and other male sexual traits (**Table S9**). Once a new miRNA is established, its expression is often broadened to other tissues. Testis may be the beachhead that permits the new miRNA to gradually modulate its expression and interactions with potential targets. In addition, new miRNAs with distinct seeds often emerge in clusters, which presumably facilitate their co-expression [29,30,59].

Unlike protein coding genes, miRNAs can easily emerge *de novo*, thanks to their small size, but can often be derived from existing

genes as well [60]. The simple structure of miRNAs may permit general inferences on features and dynamics of genic evolution. A previous example is the rate of evolution as a correlate of expression level [61]. It would be interesting to see if the inferred cycles of evolution experienced by new miRNAs are a general process.

## Materials and Methods

### Sample RNA library preparation and sequencing

Total RNA was extracted from *D. simulans* (NC48S) and from *D. pseudoobscura* using TRIzol (Ambion). Ovaries and testes from 3 to

**Table 4.**  $K_{miR}/K_S$  of the older miRNAs (60–250 Myrs) that have been evolving rapidly between *D. melanogaster* and *D. simulans*.

| miRNA                    | $K_{miR}/K_S$ ( <i>D. melanogaster</i> vs. <i>D. simulans</i> ) | $K_{miR}/K_S$ ( <i>D. melanogaster</i> vs. <i>D. virilis</i> ) | Ratio |
|--------------------------|-----------------------------------------------------------------|----------------------------------------------------------------|-------|
| dme-miR-973 <sup>a</sup> | 1.152                                                           | 0.264                                                          | 4.4   |
| dme-miR-974 <sup>a</sup> | 0.803                                                           | 0.283                                                          | 2.8   |
| dme-miR-975 <sup>a</sup> | 0.571                                                           | 0.389                                                          | 1.5   |
| dme-miR-976 <sup>a</sup> | 0.677                                                           | 0.279                                                          | 2.4   |
| dme-miR-977 <sup>a</sup> | 1.096                                                           | 0.616                                                          | 1.8   |
| dme-miR-311 <sup>b</sup> | 0.514                                                           | 0.323                                                          | 1.6   |
| dme-miR-313 <sup>b</sup> | 0.877                                                           | 0.238                                                          | 3.7   |
| dme-miR-964              | 0.898                                                           | 0.303                                                          | 3.0   |
| mean                     | 0.825                                                           | 0.337                                                          | 2.5   |

<sup>a</sup>miRNAs from miR-972s.<sup>b</sup>miRNAs from miR-310s.

doi:10.1371/journal.pgen.1004096.t004

5-day adults were dissected and collected for both NC48S and *D. pseudoobscura*. Imaginal discs including central nerve system (CNS) were dissected from wandering third-instar larva of *D. pseudoobscura*. Small RNA libraries were generated from each RNA sample using Illumina Small RNA Sample Preparation kit, and sequenced with the Illumina HiSeq 2000 at the Beijing Genomics Institute (Shenzhen). The data were deposit at Gene Expression Omnibus (GEO) database (<http://www.ncbi.nlm.nih.gov/geo/>) under the accession numbers GSM1165052-GSM1165056.

### Data compilation

The publicly available small RNA sequencing reads from four *Drosophila* species (*D. melanogaster*, *D. simulans*, *D. pseudoobscura* and *D. virilis*) were downloaded from GEO database (<http://www.ncbi.nlm.nih.gov/geo/>, **Table S1**). The miRNA sequences of

three *Culicinae* species (*Aedes albopictus*, *A. aegypti* and *Culex quinquefasciatus*) were adopted from two previous small RNA sequencing studies [24,25]. *Drosophila* genome sequences were retrieved from UCSC (<http://genome.ucsc.edu>); the Whole Genome Alignment (WGA) and CDS alignment were obtained from 12 *Drosophila* Assembly/Alignment/Annotation (<http://rana.lbl.gov/drosophila>). The genome versions used were: *D. melanogaster*, dm3; *D. simulans*, droSim1; *D. sechellia*, droSec1; *D. yakuba*, droYak2; *D. erecta*, droEre2; *D. ananassae*, droAna3; *D. pseudoobscura*, dp4; *D. persimilis*, droPer1; *D. willistoni*, droWil1; *D. mojavensis*, droMoj3; *D. virilis*, droVir3; *D. grimshawi*, droGri2. The genome coordinates and sequences of miRNA genes were retrieved from miRBase Release 19 (<http://www.mirbase.org>). The genome coordinates and sequences of intron, rRNA, tRNA, snRNA and transposon elements were obtained from FlyBase (r5.41, <http://flybase.org>).

### Defining canonical miRNAs, mirtrons and miRNA clusters

We defined canonical miRNAs and mirtrons according to Ruby *et al.* [62]. Mirtrons were defined as pre-miRNAs with both 5' and 3' ends matching the splicing sites of host introns. The rest of the miRNAs were then classified as canonical miRNAs. When more than three miRNAs were located within a 20 kb region, these miRNAs were considered as a cluster.

### miRNA annotation and expression analysis

Small RNA reads (18–30 nt) were extracted from sequencing data. Firstly, we excluded reads mapped to transposon elements and structural RNAs (rRNA, tRNA and snRNA) using bowtie [63], allowing no mismatch. Next, we annotated novel miRNAs by miRDeep2 [64] with default parameters. Finally, miRNAs with no read matching miR\* were removed following previous practice [23]. We combined novel miRNAs sequences and known miRNA sequences for expression analysis.

For each species, small RNA reads (18–30 nt) were mapped to miRNA precursor sequences using bowtie [63], allowing no mismatch. Each read count was divided by the number of matches to miRNA precursors. The miRNA expression was normalized by total miRNA counts and scaled to reads per million (RPM), as previous described [18].

### Phylogenetic dating of miRNAs

We examined phylogenetic distributions of the *D. melanogaster* miRNAs in three other *Drosophila* species (*D. simulans*, *D.*

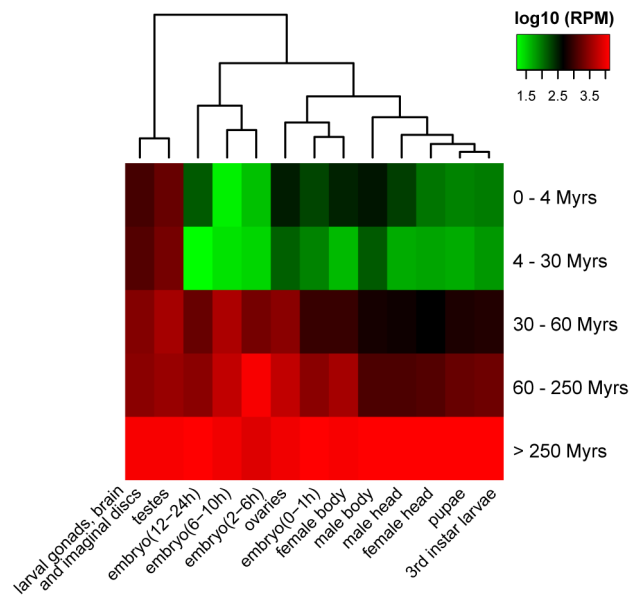

**Figure 5. Clustering of miRNA expression among different age groups and tissues (or developmental stages).** Expression level of each miRNA age group is calculated based on small RNA libraries from different tissues and developmental stages of *D. melanogaster* (**Table S1**).

doi:10.1371/journal.pgen.1004096.g005



*pseudoobscura* and *D. virilis*) and three *Culicinae* species (*Aedes albopictus*, *A. aegypti* and *Culex quinquefasciatus*), where small RNAs have been profiled via deep sequencing [12,16,22,24,25]. Based on the comprehensive dataset, miRNA homologs were determined by homology search using either the whole genome alignment (WGA) within the *Drosophila* group or BLAST (threshold  $E < 10^{-5}$ ) between *Drosophila* species and mosquitoes, and cross-checked with small RNA reads in the species in query (at least one read matching mature and miR\*).

The homologous sequences of the *D. melanogaster* miRNA precursors in *D. simulans* (droSim1), *D. pseudoobscura* (dp4) and *D. virilis* (droVir3) were extracted from UCSC pairwise WGAs using LiftOver (<http://hgdownload.cse.ucsc.edu/>, minMatch = 0.6). The precursors failing to obtain hits in the genomes were subjected to BLASTN search against NCBI trace archives (<http://www.ncbi.nlm.nih.gov/Traces/home/>). Matched sequences with E-values  $< 10^{-5}$  were also considered as miRNA homologs and recovered for the analysis below. The WGA output was compared with miRNA annotation by miRDeep2 [64]; miRNA orthologs confirmed by miRDeep2 were retained.

The miRNA precursor sequences in *Aedes albopictus*, *Culex quinquefasciatus* and *A. aegypti* were adopted from the studies of Li *et al.* [24] and Skalsky *et al.* [25]. These sequences were combined and subjected to BLASTN search against miRNA precursors in *D. melanogaster*. The best reciprocal hits with E-values  $< 10^{-5}$  were retained as the corresponding miRNA homologs in the *Culicinae* lineage.

According to the phylogenetic distribution, maximum parsimony method was used to infer the origination of each miRNA along the main trunk of the phylogenetic tree of *D. melanogaster*, *D. simulans*, *D. pseudoobscura*, *D. virilis* and *Culicinae*. An miRNA is assumed to emerge in the most recent common ancestor of all the species bearing the authentic homologs. The branch lengths of the phylogenetic tree (in Myrs) were adopted from previous estimations [27,65,66]. The 238 miRNAs were classified into five age groups, corresponding to the time intervals of 0–4 Myrs, 4–30 Myrs, 30–60 Myrs, 60–250 Myrs and  $> 250$  Myrs.

### Genealogy of miR-982s in *Drosophila* species

The genomic coordinates and precursor sequences of dme-miR-982/303/983-1/983-2/984 and dsi-miR-982c/2582b/982b/2582a/982a/303/983 were retrieved from miRBase (Release v19). Based on the WGA of 12 *Drosophila* genomes [27], genomic sequence of the whole miR-982s cluster (~9 Kb) in *D. melanogaster* (dm3) was extracted and used as a query to search against the other 11 *Drosophila* genomes using BLAT [67] with an E-value threshold of 0.001. We only detected hits in *D. simulans*, *D. sechellia*, *D. yakuba* and *D. erecta*, indicating that miR-982s is specific to the *melanogaster* subgroup. Homologous sequences of the miR-982s cluster from the five species were aligned using MUSCLE [68]. Homologs of miR-982s members in each species were identified using BLAST with the query of known precursor sequences (miRBase Release v19) and an E-value threshold of 0.001. The hits were further inspected in the alignment of the whole miR-982s cluster. The phylogenetic tree of each family of miR-982, miR-2582, miR-303, and miR-983 was reconstructed using the maximum likelihood method as implemented in MEGA 5.0 [69].

To validate the existence of miR-982s members in *D. yakuba* and *D. erecta*, we first predicted the secondary structure and thermo-stability of each miRNA homolog using RNAfold (<http://ma.tbi.univie.ac.at/>) with the default parameters [70]. A good hairpin with minimum free energy (MFE)  $> 15$  kcal/mol was considered as a potential miRNA candidate. There were four such candidates: dya-miR-2582-anc, dya-miR-303-anc, der-miR-982-anc, and der-miR-983-anc, where “anc”

indicates ancestor. Then, we validated the expression of each candidate by amplifying the potential miRNA precursor from cDNA because the mature miRNA is hard to define. Total RNAs were extracted from testes of *D. yakuba* and *D. erecta* using TRIzol (Ambion) and treated with TURBO DNase Kit (Ambion). 0.5 ug RNA was reverse transcribed (RT) in a 20 ul reaction volume using PrimeScript II 1st Strand cDNA Synthesis Kit (TaKaRa). 1 ul RT products were used for PCR with Ex Taq DNA Polymerase (TaKaRa). PCR primers used are listed in **Table S10**.

### Population genetic analysis of miR-982s in *D. melanogaster* and *D. simulans*

A total of 25 *D. simulans* lines and 42 *D. melanogaster* lines, including 29 M lines and 13 Z lines, were used for population sequencing of the miR-982s cluster. The fly strains used were listed in **Table S4**. The genomic sequences of *D. simulans* (droSim1) and *D. melanogaster* (dm3) were used to design primer pairs that amplify a ~8 Kb region spanning the whole miR-982s cluster and ~1.5 Kb each of the upstream and downstream flanking regions. The PCR product of each primer set was designed to be about 2 Kb in length and overlapped with each other by at least 300 bp. The primers used are listed in **Table S10** and their genomic coordinates are displayed in **Fig. S5**. PCR was carried out using LA Taq DNA Polymerase (TaKaRa). PCR products were subject to direct sequencing or clone sequencing on an ABI 3730xl DNA Analyzer (Applied Biosystems). DNA sequences were assembled using SeqMan software (DNASTAR Inc., USA) and aligned using MUSCLE [68] with manual inspection. Haplotypes were inferred with the PHASE program when heterozygous sites were present [71]. The sequences obtained in this study have been deposited in GenBank under the accession numbers JX648211–JX648278.

Using the population sequencing data, several methods were used to detect positive selection of miR-982s in *D. melanogaster* and *D. simulans*, respectively. First, MK tests were applied on each member of miR-982s based on the divergence between *D. melanogaster* and *D. simulans* consensus sequences and polymorphism within either species. Each miRNA precursor was tested against a 1 kb region about 1.5 kb upstream of the 5' end of miR-982s. Second, sliding window analysis of divergence and polymorphism was applied to the whole miR-982s cluster and its flanking region. The divergence was calculated using Kimura's 2-parameter model [72] based on the genomic sequences of *D. simulans* (droSim1) and *D. melanogaster* (dm3). The polymorphism within either species was estimated using the method described previously [35,36,73,74]. *D. simulans* (droSim1) and *D. melanogaster* (dm3) were used as the outgroup for each other reciprocally, in order to polarize the derived alleles. The window size is 100 bp and the step width is 25 bp. Finally, based on our miR-982s population data or DPGP2 data (see below) [41], the pattern of population differentiation (Fst) between Z and M lines was estimated for each miRNA precursor using Weir's method [40].

### Analysis of the evolutionary fate of miRNAs

We used the McDonald-Kreitman test (MK test) [32] framework to detect positive selection in miRNAs from each age group based on the polymorphisms within *D. melanogaster* and the divergence between *D. melanogaster* and *D. simulans*. Precursor or mature sequences of each miRNA group were combined and treated as the functional category, while the 4-fold degenerate sites in the whole genome were used as the neutral control. The divergence is calculated by counting the number of changed nucleotide sites between *D. melanogaster* (dm3) and *D. simulans* (droSim1) based on the UCSC whole genome alignment. Polymorphism data was retrieved from *Drosophila* Population Genomics Project (DPGP, <http://www.dpgp.org/>, release 1.0).

SNPs that were detected on more than thirty individuals and exhibited a derived allele frequency (DAF)  $>5\%$  were used for the MK test.

The proportion of adaptively fixed mutations ( $\alpha$ ) was estimated as previously described [75]. To estimate the evolutionary fate of each miRNA, we first screened for adaptive miRNAs among the 238 candidates by using each miRNA's precursor together with the 50 bp flanking sequences on both sides as the functional sites. The  $p$ -values of multiple MK tests were adjusted by the Benjamini-Hochberg method [76] and the adaptive significance of each candidate is re-validated by using the precursor alone in the MK test. We then identified the conservative miRNAs by comparing the number of substitutions in the miRNA precursors ( $K_{\text{miR}}$ ) with the number of substitutions in the synonymous sites ( $K_{\text{S}}$ ) between *D.melanogaster* and *D.simulans*. miRNAs with  $K_{\text{miR}}/K_{\text{S}} < 0.5$  were considered to be conservatively evolving. Kimura's 2-parameter model [72] and the Nei-Gojobori model [77] were used to calculate  $K_{\text{miR}}$  and  $K_{\text{S}}$ , respectively. Finally, excluding the adaptive and conservative miRNAs, the remaining were considered to be in transition between adaptive to conservative/death.

### Evolutionary analysis of miRNA expression patterns

Data processing of small RNA deep sequencing libraries from different development stages and tissues of *D. melanogaster* [12,16,18–21,23] was conducted as described above. The read counts of each miRNAs were normalized to Reads Per Million (RPM), which is the read number of each miRNA per million mapped reads in each library. The normalized counts were  $\log_2$  transformed and subject to hierarchical clustering using R package heatmap2.

### Target prediction of miR-982s and functional annotation

miR-982s targets were predicted by seed match using TargetScan (v5.0 [http://www.targetscan.org/fly\\_12/](http://www.targetscan.org/fly_12/)) [5]. Taking all the miRNA members together, 1,002 targets were obtained in *D. melanogaster* and 3,563 in *D. simulans*, of which 454 were shared by both species. We used DAVID to perform a Gene Ontology (GO) enrichment test for the predicted targets in the two species (DAVID v6.7, <http://david.abcc.ncifcrf.gov/>) [78]. Only the GO terms for biological processes were used for the enrichment test.

### Supporting Information

**Figure S1** The verification of the existence of miR-982s members in *D. yakuba* or *D. erecta*. (A) Prediction of secondary structures for the ancestral miRNA candidates. For miR-2582 and miR-303, homologous sequences in *D. yakuba* were used; for miR-982 and miR-983, homologous sequences in *D. erecta* were used. Minimum free energy is labeled below each precursor. (B) Gel analysis of potential expression of the candidate miRNA precursors in **Fig. S1A**. RT-PCR was conducted using total RNA extracted from testes of *D. yakuba* (for miR-2582/303) or *D. erecta* (for miR-982/983). (PDF)

**Figure S2** Multiple sequence alignment of miRNA families in miR-982s. (A) miR-2582 family, (B) miR-982 family, (C) miR-303 family and (D) miR-983 family. The consensus secondary structures were denoted above the alignments. (PDF)

**Figure S3** Genealogies and analysis of secondary structures of miR-982s. (A) miR-2582 family, (B) miR-982 family, (C) miR-303 family and (D) miR-983 family. Genealogical trees were constructed using maximum likelihood method implemented in

MEGA 5.0 [69]. Secondary structures of homologous miRNA sequences were predicted using RNAfold (<http://rna.tbi.univie.ac.at/>) with the default parameters [70]. Estimated minimal free energy (MFE) is labeled for each hairpin. Color bar indicates base-pairing probabilities (or the probability of being unpaired in the unpaired regions). (PDF)

**Figure S4** Sliding window analysis of divergence and polymorphism of miR-982s (window size = 100, step = 25). Gene structures are illustrated below the window with orange blocks for miRNA genes, grey blocks for exons of *CG3626* and dash lines for alignment gaps. (A) Divergence between *D. melanogaster* and *D. simulans*. The upper and lower lines indicate gene structures of miR-982s in *D. melanogaster* and *D. simulans*, respectively. Orange blocks denote dme-miR-982, dme-miR-303, dme-miR-983-1, dme-miR-983-2 and dme-miR-984 in *D. melanogaster*, and dsi-miR-982c, dsi-miR-2582b, dsi-miR-982b, dsi-miR-2582a, dsi-miR-982a, dsi-miR-303 and dsi-miR-983 in *D. simulans*. (B) Polymorphism in *D. melanogaster*. Gene structure is indicated as the upper line in (A). (C) Polymorphism in *D. simulans*. Gene structure is indicated as the lower line in (A). (PDF)

**Figure S5** Primer design of miR-982s for PCR amplification and sequencing. Blue ticks denote the positions of primers. Red ticks denote miRNA genes. (PDF)

**Table S1** The GEO accession numbers of the small RNA libraries used in this study. (PDF)

**Table S2** Normalized miRNA expression (RPM) in different tissues and developmental stages of *D. melanogaster*. Small RNA sequencing data were retrieved from GEO database as listed in Table S1. (XLSX)

**Table S3** miRNAs clustered in miR-982s, miR-310s, and miR-972s in *D. melanogaster*. (PDF)

**Table S4** Fly strains used for population sequencing of the miR-982s cluster. (PDF)

**Table S5** Estimates of proportions of selection regimes on different classes of miRNA genes. Both canonical miRNAs and mirtrons from different age groups were classified into two subgroups according to their expression levels: low ( $\leq 200$  RPM) and high ( $> 200$  PRM). The number of genes in each category is given in the parentheses. D, divergence between *D. melanogaster* and *D. simulans*; P, polymorphism in populations of *D. melanogaster* (DPGP); DAF, derived allele frequency;  $\alpha$ , the fraction of adaptive fixations; b, the fraction of new mutants that are weakly deleterious; d, the fraction of new mutants that are strongly deleterious; f, the expected number of neutral segregating sites. (PDF)

**Table S6** Fst of each miRNA from miR-982s between M-line and Z-line. (PDF)

**Table S7**  $K_{\text{miR}}/K_{\text{S}}$  of the older miRNAs (60–250 Myrs) that have been evolving rapidly between *D. melanogaster* and *D. simulans*. The common ancestral sequences of *D. melanogaster* and *D. simulans* are inferred from *D. yakuba* and *D. erecta*. (PDF)

**Table S8** Age and evolutionary mode of the 136 highly expressed, canonical miRNAs analyzed in this study. (PDF)

**Table S9** GO enrichment of the predicted target genes of miR-982s in *D. melanogaster* and *D. simulans*. Targets were predicted by seed match using TargetScan (v5.0 [http://www.targetscan.org/fly\\_12/](http://www.targetscan.org/fly_12/)) [5]. (PDF)

**Table S10** PCR primers of the miR-982s cluster. (PDF)

**Text S1** Interpretation of McDonald-Kreitman test result. (PDF)

**Text S2** An alternative explanation for expression evolution of new and old miRNAs. (PDF)

**Text S3** The evolution of miR-982s, miR-310s and miR-972s expression. (PDF)

## Acknowledgments

We thank Tianyuan Zhang for experiment instructions, Yi Wang for help with population sequencing and Yu Wang for critical reading.

## Author Contributions

Conceived and designed the experiments: YL YS CIW TT. Performed the experiments: YL HL YC LG YZ. Analyzed the data: YL YS EH CIW TT. Contributed reagents/materials/analysis tools: CIW SS TT. Wrote the paper: YL CIW TT.

## References

- Bartel DP (2004) MicroRNAs: genomics, biogenesis, mechanism, and function. *Cell* 116: 281–297.
- Bushati N, Cohen SM (2007) microRNA functions. *Annu Rev Cell Dev Biol* 23: 175–205.
- Kim VN, Han J, Siomi MC (2009) Biogenesis of small RNAs in animals. *Nat Rev Mol Cell Biol* 10: 126–139.
- Bartel DP (2009) MicroRNAs: target recognition and regulatory functions. *Cell* 136: 215–233.
- Lewis BP, Burge CB, Bartel DP (2005) Conserved seed pairing, often flanked by adenosines, indicates that thousands of human genes are microRNA targets. *Cell* 120: 15–20.
- Hornstein E, Shomron N (2006) Canalization of development by microRNAs. *Nat Genet* 38 Suppl: S20–24.
- Wu CI, Shen Y, Tang T (2009) Evolution under canalization and the dual roles of microRNAs: a hypothesis. *Genome Res* 19: 734–743.
- Waddington C (1942) Canalization of development and the inheritance of acquired characters. *Nature* 150: 563–565.
- Waddington C (1960) Experiments on canalizing selection. *Genet Res* 1: 140–150.
- Rutherford SL, Lindquist S (1998) Hsp90 as a capacitor for morphological evolution. *Nature* 396: 336–342.
- Queitsch C, Sangster TA, Lindquist S (2002) Hsp90 as a capacitor of phenotypic variation. *Nature* 417: 618–624.
- Lu J, Shen Y, Wu Q, Kumar S, He B, et al. (2008) The birth and death of microRNA genes in *Drosophila*. *Nat Genet* 40: 351–355.
- Meunier J, Lemoine F, Soumillon M, Liechti A, Weier M, et al. (2013) Birth and expression evolution of mammalian microRNA genes. *Genome Res* 23: 34–45.
- Bentwich I, Avniel A, Karov Y, Aharonov R, Gilad S, et al. (2005) Identification of hundreds of conserved and nonconserved human microRNAs. *Nat Genet* 37: 766–770.
- Zhou Q, Zhang G, Zhang Y, Xu S, Zhao R, et al. (2008) On the origin of new genes in *Drosophila*. *Genome Res* 18: 1446–1455.
- Berezikov E, Liu N, Flynt AS, Hodges E, Rooks M, et al. (2010) Evolutionary flux of canonical microRNAs and mirtrons in *Drosophila*. *Nat Genet* 42: 6–9; author reply 9–10.
- Lu J, Shen Y, Carthew RW, Wang SM, Wu CI (2010) Reply to “Evolutionary flux of canonical microRNAs and mirtrons in *Drosophila*”. *Nat Genet* 42: 9–10.
- Ruby JG, Stark A, Johnston WK, Kellis M, Bartel DP, et al. (2007) Evolution, biogenesis, expression, and target predictions of a substantially expanded set of *Drosophila* microRNAs. *Genome Res* 17: 1850–1864.
- Chung WJ, Okamura K, Martin R, Lai EC (2008) Endogenous RNA interference provides a somatic defense against *Drosophila* transposons. *Curr Biol* 18: 795–802.
- Czech B, Malone CD, Zhou R, Stark A, Schlingeheyde C, et al. (2008) An endogenous small interfering RNA pathway in *Drosophila*. *Nature* 453: 798–802.
- Lau NC, Robine N, Martin R, Chung WJ, Niki Y, et al. (2009) Abundant primary piRNAs, endo-siRNAs, and microRNAs in a *Drosophila* ovary cell line. *Genome Res* 19: 1776–1785.
- Rozhkov NV, Aravin AA, Zelentsova ES, Schostak NG, Sachidanandam R, et al. (2010) Small RNA-based silencing strategies for transposons in the process of invading *Drosophila* species. *RNA* 16: 1634–1645.
- Berezikov E, Robine N, Samsonova A, Westholm JO, Naqvi A, et al. (2011) Deep annotation of *Drosophila melanogaster* microRNAs yields insights into their processing, modification, and emergence. *Genome Res* 21: 203–215.
- Li S, Mead EA, Liang S, Tu Z (2009) Direct sequencing and expression analysis of a large number of miRNAs in *Aedes aegypti* and a multi-species survey of novel mosquito miRNAs. *BMC Genomics* 10: 581.
- Skalsky RL, Vanlandingham DL, Scholle F, Higgs S, Cullen BR (2010) Identification of microRNAs expressed in two mosquito vectors, *Aedes albopictus* and *Culex quinquefasciatus*. *BMC Genomics* 11: 119.
- Kozomara A, Griffiths-Jones S (2011) miRBase: integrating microRNA annotation and deep-sequencing data. *Nucleic Acids Res* 39: D152–157.
- Clark AG, Eisen MB, Smith DR, Bergman CM, Oliver B, et al. (2007) Evolution of genes and genomes on the *Drosophila* phylogeny. *Nature* 450: 203–218.
- Berezikov E (2011) Evolution of microRNA diversity and regulation in animals. *Nat Rev Genet* 12: 846–860.
- Zhang R, Peng Y, Wang W, Su B (2007) Rapid evolution of an X-linked microRNA cluster in primates. *Genome Res* 17: 612–617.
- Li J, Liu Y, Dong D, Zhang Z (2010) Evolution of an X-linked primate-specific micro RNA cluster. *Mol Biol Evol* 27: 671–683.
- Fay JC, Wu CI (2003) Sequence divergence, functional constraint, and selection in protein evolution. *Annu Rev Genomics Hum Genet* 4: 213–235.
- McDonald JH, Kreitman M (1991) Adaptive protein evolution at the Adh locus in *Drosophila*. *Nature* 351: 652–654.
- Lu J, Fu Y, Kumar S, Shen Y, Zeng K, et al. (2008) Adaptive evolution of newly emerged micro-RNA genes in *Drosophila*. *Mol Biol Evol* 25: 929–938.
- Fay JC, Wyckoff GJ, Wu CI (2002) Testing the neutral theory of molecular evolution with genomic data from *Drosophila*. *Nature* 415: 1024–1026.
- Fay JC, Wu CI (2000) Hitchhiking under positive Darwinian selection. *Genetics* 155: 1405–1413.
- Zeng K, Fu YX, Shi S, Wu CI (2006) Statistical tests for detecting positive selection by utilizing high-frequency variants. *Genetics* 174: 1431–1439.
- Wu CI, Hollocher H, Begun DJ, Aquadro CF, Xu Y, et al. (1995) Sexual isolation in *Drosophila melanogaster*: a possible case of incipient speciation. *Proc Natl Acad Sci U S A* 92: 2519–2523.
- Hollocher H, Ting CT, Wu ML, Wu CI (1997) Incipient speciation by sexual isolation in *Drosophila melanogaster*: extensive genetic divergence without reinforcement. *Genetics* 147: 1191–1201.
- Ting CT, Takahashi A, Wu CI (2001) Incipient speciation by sexual isolation in *Drosophila*: concurrent evolution at multiple loci. *Proc Natl Acad Sci U S A* 98: 6709–6713.
- Weir BS, Cockerham CC (1984) Estimating F-Statistics for the analysis of population structure. *Evolution* 38: 1358–1370.
- Pool JE, Corbett-Detig RB, Sugino RP, Stevens KA, Cardeno CM, et al. (2012) Population Genomics of sub-saharan *Drosophila melanogaster*: African diversity and non-African admixture. *PLoS Genet* 8: e1003080.
- Grimson A, Srivastava M, Fahey B, Woodcroft BJ, Chiang HR, et al. (2008) Early origins and evolution of microRNAs and Piwi-interacting RNAs in animals. *Nature* 455: 1193–1197.
- Liang H, Li WH (2009) Lowly expressed human microRNA genes evolve rapidly. *Mol Biol Evol* 26: 1195–1198.
- Nozawa M, Miura S, Nei M (2010) Origins and evolution of microRNA genes in *Drosophila* species. *Genome Biol Evol* 2: 180–189.
- Heimberg AM, Sempere LF, Moy VN, Donoghue PC, Peterson KJ (2008) MicroRNAs and the advent of vertebrate morphological complexity. *Proc Natl Acad Sci U S A* 105: 2946–2950.
- Yokoyama S, Meany A, Wilkens H, Yokoyama R (1995) Initial mutational steps toward loss of opsin gene function in cavefish. *Mol Biol Evol* 12: 527–532.
- Maere S, De Bodt S, Raes J, Casneuf T, Van Montagu M, et al. (2005) Modeling gene and genome duplications in eukaryotes. *Proc Natl Acad Sci U S A* 102: 5454–5459.
- Levine MT, Jones CD, Kern AD, Lindfors HA, Begun DJ (2006) Novel genes derived from noncoding DNA in *Drosophila melanogaster* are frequently X-linked and exhibit testis-biased expression. *Proc Natl Acad Sci U S A* 103: 9935–9939.
- Ding Y, Zhao L, Yang S, Jiang Y, Chen Y, et al. (2010) A young *Drosophila* duplicate gene plays essential roles in spermatogenesis by regulating several Y-linked male fertility genes. *PLoS Genet* 6: e1001255.
- Kaessmann H (2010) Origins, evolution, and phenotypic impact of new genes. *Genome Res* 20: 1313–1326.

51. Wu DD, Irwin DM, Zhang YP (2011) *De novo* origin of human protein-coding genes. *PLoS Genet* 7: e1002379.
52. Chen S, Ni X, Krinsky BH, Zhang YE, Vibranovski MD, et al. (2012) Reshaping of global gene expression networks and sex-biased gene expression by integration of a young gene. *EMBO J* 31: 2798–2809.
53. Yeh SD, Do T, Chan C, Cordova A, Carranza F, et al. (2012) Functional evidence that a recently evolved *Drosophila* sperm-specific gene boosts sperm competition. *Proc Natl Acad Sci U S A* 109: 2043–2048.
54. Ross BD, Rosin L, Thomae AW, Hiatt MA, Vermaak D, et al. (2013) Stepwise evolution of essential centromere function in a *Drosophila* neogene. *Science* 340: 1211–1214.
55. Wu CI, Davis AW (1993) Evolution of postmating reproductive isolation: the composite nature of Haldane's rule and its genetic bases. *Am Nat* 142: 187–212.
56. Wyckoff GJ, Wang W, Wu CI (2000) Rapid evolution of male reproductive genes in the descent of man. *Nature* 403: 304–309.
57. Wu CI, Ting CT (2004) Genes and speciation. *Nat Rev Genet* 5: 114–122.
58. Swanson WJ, Vacquier VD (2002) The rapid evolution of reproductive proteins. *Nat Rev Genet* 3: 137–144.
59. Glazov EA, McWilliam S, Barris WC, Dalrymple BP (2008) Origin, evolution, and biological role of miRNA cluster in *DLK-DIO3* genomic region in placental mammals. *Mol Biol Evol* 25: 939–948.
60. Marco A, Ninova M, Ronshaugen M, Griffiths-Jones S (2013) Clusters of microRNAs emerge by new hairpins in existing transcripts. *Nucleic Acids Res* 41: 7745–7752.
61. Shen Y, Lv Y, Huang L, Liu W, Wen M, et al. (2011) Testing hypotheses on the rate of molecular evolution in relation to gene expression using microRNAs. *Proc Natl Acad Sci U S A* 108: 15942–15947.
62. Ruby JG, Jan CH, Bartel DP (2007) Intronic microRNA precursors that bypass Drosha processing. *Nature* 448: 83–86.
63. Langmead B, Trapnell C, Pop M, Salzberg SL (2009) Ultrafast and memory-efficient alignment of short DNA sequences to the human genome. *Genome Biol* 10: R25.
64. Friedlander MR, Chen W, Adamidi C, Maaskola J, Einspanier R, et al. (2008) Discovering microRNAs from deep sequencing data using miRDeep. *Nat Biotechnol* 26: 407–415.
65. Gaunt MW, Miles MA (2002) An insect molecular clock dates the origin of the insects and accords with palaeontological and biogeographic landmarks. *Mol Biol Evol* 19: 748–761.
66. Bolshakov VN, Topalis P, Blass C, Kokoza E, della Torre A, et al. (2002) A comparative genomic analysis of two distant diptera, the fruit fly, *Drosophila melanogaster*, and the malaria mosquito, *Anopheles gambiae*. *Genome Res* 12: 57–66.
67. Kent WJ (2002) BLAT—the BLAST-like alignment tool. *Genome Res* 12: 656–664.
68. Edgar RC (2004) MUSCLE: multiple sequence alignment with high accuracy and high throughput. *Nucleic Acids Res* 32: 1792–1797.
69. Tamura K, Peterson D, Peterson N, Stecher G, Nei M, et al. (2011) MEGA5: molecular evolutionary genetics analysis using maximum likelihood, evolutionary distance, and maximum parsimony methods. *Mol Biol Evol* 28: 2731–2739.
70. Hofacker IL (2003) Vienna RNA secondary structure server. *Nucleic Acids Res* 31: 3429–3431.
71. Stephens M, Donnelly P (2003) A comparison of bayesian methods for haplotype reconstruction from population genotype data. *Am J Hum Genet* 73: 1162–1169.
72. Kimura M (1980) A simple method for estimating evolutionary rates of base substitutions through comparative studies of nucleotide sequences. *J Mol Evol* 16: 111–120.
73. Watterson GA (1975) On the number of segregating sites in genetical models without recombination. *Theor Popul Biol* 7: 256–276.
74. Tajima F (1983) Evolutionary relationship of DNA sequences in finite populations. *Genetics* 105: 437–460.
75. Mackay TF, Richards S, Stone EA, Barbadilla A, Ayroles JF, et al. (2012) The *Drosophila melanogaster* Genetic Reference Panel. *Nature* 482: 173–178.
76. Benjamini Y, Hochberg Y (1995) Controlling the false discovery rate: a practical and powerful approach to multiple testing. *J Roy Statist Soc Ser B* 57: 289–300.
77. Nei M, Gojobori T (1986) Simple methods for estimating the numbers of synonymous and nonsynonymous nucleotide substitutions. *Mol Biol Evol* 3: 418–426.
78. Huang DW, Sherman BT, Lempicki RA (2008) Systematic and integrative analysis of large gene lists using DAVID bioinformatics resources. *Nat Protocols* 4: 44–57.
79. Messer PW, Petrov DA (2013) Frequent adaptation and the McDonald-Kreitman test. *Proc Natl Acad Sci U S A* 110: 8615–8620.
