# Supplementary material for: New MicroRNAs in Drosophila—Birth, Death and Cycles of Adaptive Evolution
Source: PLOS journal article supplement (doi:10.1371/journal.pgen.1004096), 2014-01-23
Supplement: S1 (10.1371/journal.pgen.1004096.s001) [file journal.pgen.1004096.s001.pdf › journal.pgen.1004096.s001.pdf]

der-mir-983-anc  
-31.12 kcal/mol

Agarose gel electrophoresis image showing PCR products for *dya-2582-anc*, *dya-303-anc*, *der-982-anc*, and *der-983-anc*. The gel has four lanes. The first lane (*dya-2582-anc*) shows a band at 499bp. The second lane (*dya-303-anc*) shows a band at 389bp. The third lane (*der-982-anc*) shows a band at 417bp. The fourth lane (*der-983-anc*) shows a band at 326bp. A molecular weight marker is on the right with bands at 1000bp, 500bp, 400bp, 300bp, and 200bp.
