# Supplementary material for: New MicroRNAs in Drosophila—Birth, Death and Cycles of Adaptive Evolution
Source: PLOS journal article supplement (doi:10.1371/journal.pgen.1004096), 2014-01-23

[illegible][illegible]

..(((((((.(((((.((.(((((((((.((((((((((((((((((((.....)))))))))))))))))).)))))))))).)))))))))  
dya-miR-303-anc AUAUCUGCCUUGCUUAGAAUUUUAAGACCAAAAAGUUUGUUUACAAAACUAUUUACCCUAAAAUUCUAAUCUAGUCAGCA  
dme-miR-303 AAUUGAAUCUUGGUUAGGUUUCACGAGAAACUGGUUUAAUAAACGAAAACUAGUUUCCUCUAAAAUCCUAAUACAAGACAUCA  
dsi-miR-303 AUGUGAUUCUUGCUUG-GCAUUAAGGAAGCUAGUUUAAUUAACGAAAACUAGUUUCCUCUAAACGUUUCAAACAAUACAUCA

[illegible]

conservation degree  
of paired bases



Supplement: S2 (10.1371/journal.pgen.1004096.s002) [file journal.pgen.1004096.s002.pdf › journal.pgen.1004096.s002.pdf]
