# Supplementary material for: New MicroRNAs in Drosophila—Birth, Death and Cycles of Adaptive Evolution
Source: PLOS journal article supplement (doi:10.1371/journal.pgen.1004096), 2014-01-23

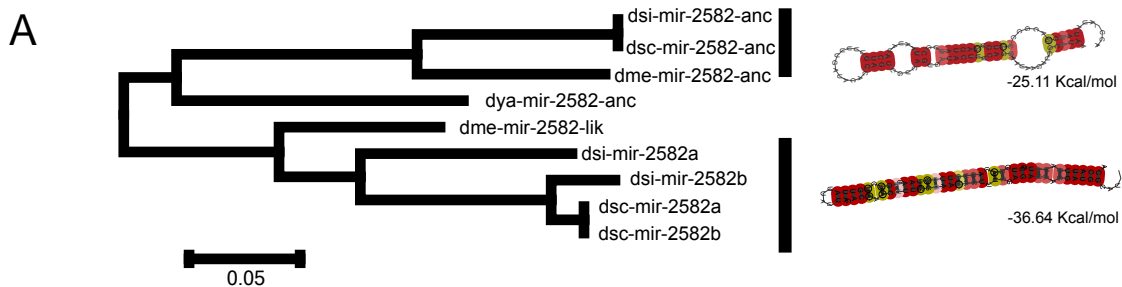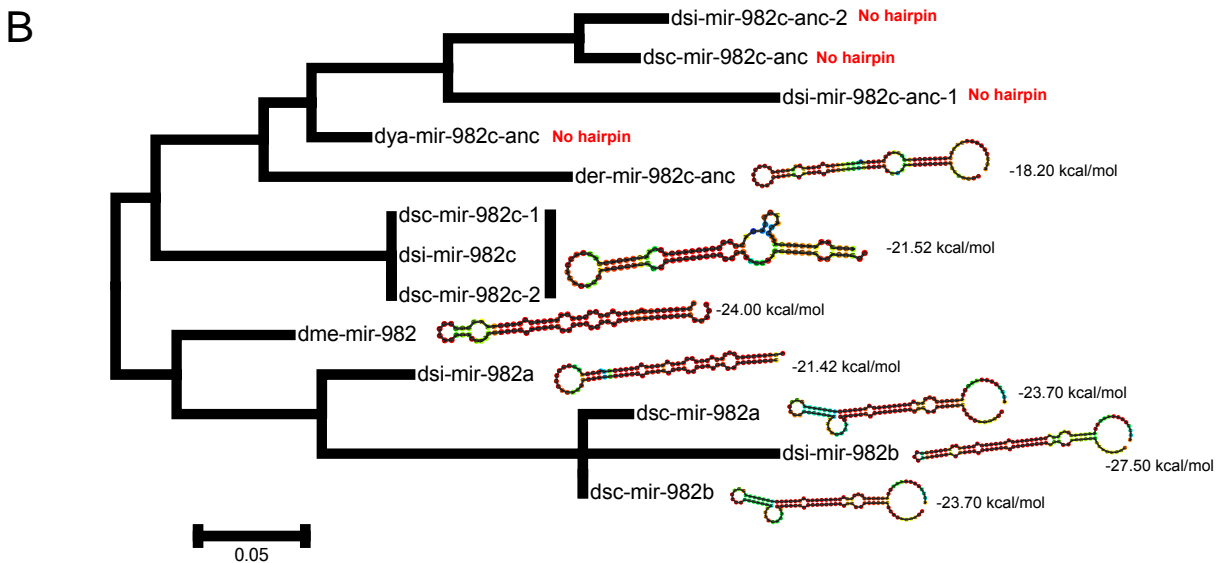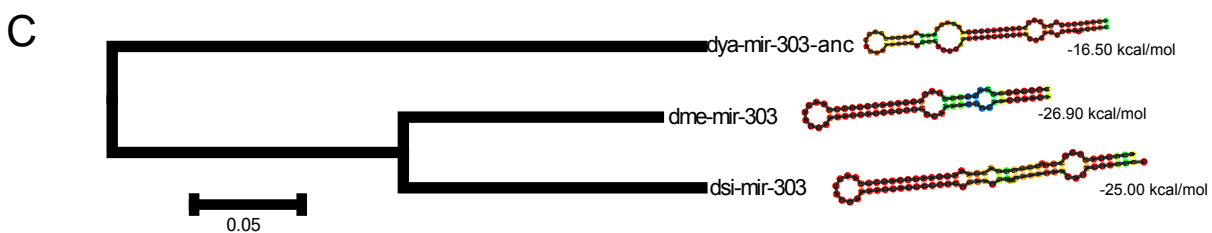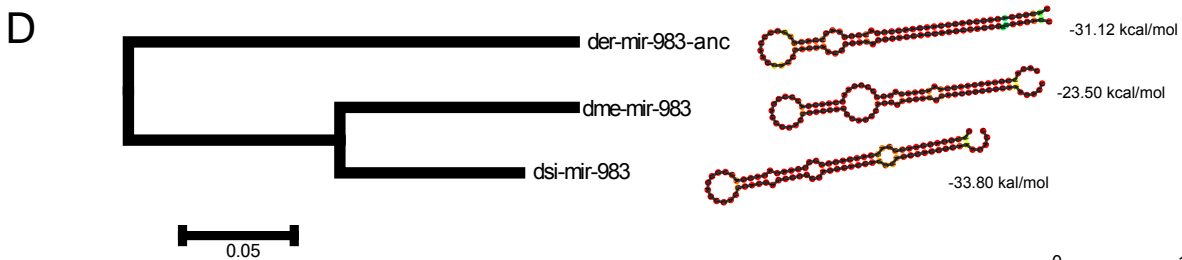

Supplement: S3 (10.1371/journal.pgen.1004096.s003) [file journal.pgen.1004096.s003.pdf › journal.pgen.1004096.s003.pdf]
