# Supplementary material for: New MicroRNAs in Drosophila—Birth, Death and Cycles of Adaptive Evolution
Source: PLOS journal article supplement (doi:10.1371/journal.pgen.1004096), 2014-01-23
Supplement: S5 (10.1371/journal.pgen.1004096.s005) [file journal.pgen.1004096.s005.pdf › journal.pgen.1004096.s005.pdf]

# *D. melanogaster*

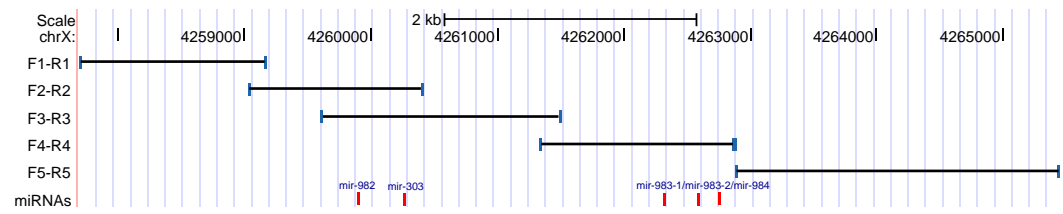

## Primers

|                            |                            |
|----------------------------|----------------------------|
| F1 TAACCAACGCCTACGACTAT    | R1 TCTAACATTTGGGCTCATTT    |
| F2 AGCCTCATATCACCGCTGTC    | R2 GAAACTGCATTCCCCGAACG    |
| F3 CAATGGCGTAAATGGTTGTG    | R3 CGTGTGCAAATAGTGGTGCT    |
| F4 TGCCATCAAGAAGATTCACAGCG | R4 CGCTGTGAATCTTCTTGATGGCA |
| F5 AAGCCATTCCCATTCACTCAC   | R5 AGACACCGACCACCAGTAGC    |

# *D. simulans*

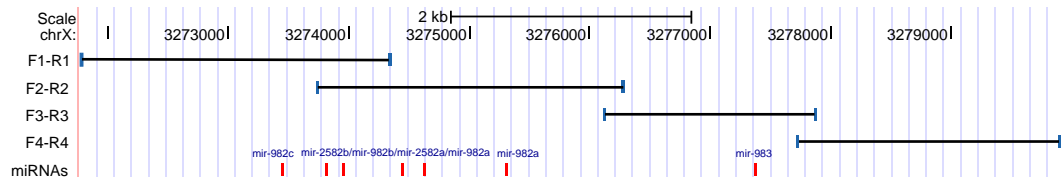

## Primers

|                           |                            |
|---------------------------|----------------------------|
| F1 AATGTGCCAATCCCAATGTT   | R1 ATTTACGCCCTTGAATGCAG    |
| F2 GATGGATTGATTTGATGATGGA | R2 TCATGGGACTAACCCGATTG    |
| F3 GCCTGAATCTGGCCCGAAGT   | R3 GCTGAAATAGCGAATGAGCGTCT |
| F4 CTGCAGTACCTCTGCTCAA    | R4 AGCAACAAACAGCTGCTCAA    |
