# Supplementary material for: New MicroRNAs in Drosophila—Birth, Death and Cycles of Adaptive Evolution
Source: PLOS journal article supplement (doi:10.1371/journal.pgen.1004096), 2014-01-23
Supplement: S6 (10.1371/journal.pgen.1004096.s006) [file journal.pgen.1004096.s006.pdf › journal.pgen.1004096.s006.pdf]

**Table S1. The GEO accession numbers of the small RNA libraries used in this study.**

| <b>GEO accession</b> | <b>Species</b>                 | <b>Tissues/Development stages</b>         | <b>Platform</b> | <b>Sources</b>           |
|----------------------|--------------------------------|-------------------------------------------|-----------------|--------------------------|
| GSM180328            | <i>Drosophila melanogaster</i> | adult heads (female heads, male heads)    | 454             | Ruby <i>et al.</i> 2007  |
| GSM180329            | <i>Drosophila melanogaster</i> | adult bodies (female bodies, male bodies) | 454             | Ruby <i>et al.</i> 2007  |
| GSM180330            | <i>Drosophila melanogaster</i> | very early embryo (0-1)                   | 454             | Ruby <i>et al.</i> 2007  |
| GSM180331            | <i>Drosophila melanogaster</i> | early embryo (2-6)                        | 454             | Ruby <i>et al.</i> 2007  |
| GSM180332            | <i>Drosophila melanogaster</i> | mid embryo (6-10)                         | 454             | Ruby <i>et al.</i> 2007  |
| GSM180333            | <i>Drosophila melanogaster</i> | late embryo (12-24)                       | 454             | Ruby <i>et al.</i> 2007  |
| GSM180334            | <i>Drosophila melanogaster</i> | larvae: 1st instar and 3rd instars        | 454             | Ruby <i>et al.</i> 2007  |
| GSM180335            | <i>Drosophila melanogaster</i> | larval brain/gonads/imaginal discs        | 454             | Ruby <i>et al.</i> 2007  |
| GSM180336            | <i>Drosophila melanogaster</i> | pupae: 0-1 day, 0-2 day, 2-4 day          | 454             | Ruby <i>et al.</i> 2007  |
| GSM180337            | <i>Drosophila melanogaster</i> | tissue culture cells (S2 only)            | 454             | Ruby <i>et al.</i> 2007  |
| GSM246084            | <i>Drosophila melanogaster</i> | adult male heads                          | 454             | Lu <i>et al.</i> 2008    |
| GSM280082            | <i>Drosophila melanogaster</i> | adult ovaries from 2-4 day old flies      | solexa          | Czech <i>et al.</i> 2008 |
| GSM280085            | <i>Drosophila melanogaster</i> | adult testes from 2-4 day old flies       | solexa          | Czech <i>et al.</i> 2008 |
| GSM280088            | <i>Drosophila melanogaster</i> | S2cell (AGO1IP)                           | solexa          | Czech <i>et al.</i> 2008 |
| GSM385744            | <i>Drosophila melanogaster</i> | OSS cell replicates 1                     | solexa          | Lau <i>et al.</i> 2009   |
| GSM385748            | <i>Drosophila melanogaster</i> | OSS cell replicates 2                     | solexa          | Lau <i>et al.</i> 2009   |
| GSM385821            | <i>Drosophila melanogaster</i> | OSS cell replicates 3                     | solexa          | Lau <i>et al.</i> 2009   |
| GSM385822            | <i>Drosophila melanogaster</i> | OSS cell replicates 4                     | solexa          | Lau <i>et al.</i> 2009   |
| GSM275691            | <i>Drosophila melanogaster</i> | larval brain/gonads/imaginal discs        | solexa          | Chung <i>et al.</i> 2008 |
| GSM286613            | <i>Drosophila melanogaster</i> | 0-1hr embryo replicates 2                 | solexa          | Chung <i>et al.</i> 2008 |
| GSM286604            | <i>Drosophila melanogaster</i> | 0-1hr embryo replicates 1                 | solexa          | Chung <i>et al.</i> 2008 |
| GSM286605            | <i>Drosophila melanogaster</i> | 2-6hr embryo replicates 1                 | solexa          | Chung <i>et al.</i> 2008 |
| GSM286606            | <i>Drosophila melanogaster</i> | 2-6hr embryo replicates 2                 | solexa          | Chung <i>et al.</i> 2008 |
| GSM286607            | <i>Drosophila melanogaster</i> | 6-10hr embryo replicates 1                | solexa          | Chung <i>et al.</i> 2008 |
| GSM286611            | <i>Drosophila melanogaster</i> | 6-10hr embryo replicates 2                | solexa          | Chung <i>et al.</i> 2008 |
| GSM286602            | <i>Drosophila melanogaster</i> | adult male body                           | solexa          | Chung <i>et al.</i> 2008 |
| GSM286603            | <i>Drosophila melanogaster</i> | adult female body                         | solexa          | Chung <i>et al.</i> 2008 |
| GSM240749            | <i>Drosophila melanogaster</i> | adult female head                         | solexa          | Chung <i>et al.</i> 2008 |
| GSM286601            | <i>Drosophila melanogaster</i> | adult male head                           | solexa          | Chung <i>et al.</i> 2008 |
| GSM364902            | <i>Drosophila melanogaster</i> | 12-24hr embryo                            | solexa          | modENCODE                |
| GSM322245            | <i>Drosophila melanogaster</i> | 3rd instar larvae replicates 2            | solexa          | modENCODE                |
| GSM322208            | <i>Drosophila melanogaster</i> | 3rd instar larvae replicates 1            | solexa          | modENCODE                |
| GSM322219            | <i>Drosophila melanogaster</i> | 2-4 day old pupae replicates 1            | solexa          | modENCODE                |
| GSM322338            | <i>Drosophila melanogaster</i> | 2-4 day old pupae replicates 2            | solexa          | modENCODE                |
| GSM399105            | <i>Drosophila melanogaster</i> | larval brain/gonads/imaginal discs        | solexa          | modENCODE                |
| GSM360256            | <i>Drosophila melanogaster</i> | 1st instar larvae replicates 1            | solexa          | modENCODE                |
| GSM360257            | <i>Drosophila melanogaster</i> | 1st instar larvae replicates 2            | solexa          | modENCODE                |

|            |                                 |                                      |        |                              |
|------------|---------------------------------|--------------------------------------|--------|------------------------------|
| GSM360260  | <i>Drosophila melanogaster</i>  | 0-1 day old pupae                    | solexa | modENCODE                    |
| GSM360262  | <i>Drosophila melanogaster</i>  | 0-2 day old pupae                    | solexa | modENCODE                    |
| GSM322533  | <i>Drosophila melanogaster</i>  | adult female head                    | solexa | modENCODE                    |
| GSM322543  | <i>Drosophila melanogaster</i>  | adult male head                      | solexa | modENCODE                    |
| GSM399106  | <i>Drosophila melanogaster</i>  | adult female body                    | solexa | modENCODE                    |
| GSM399107  | <i>Drosophila melanogaster</i>  | adult male body                      | solexa | modENCODE                    |
| GSM1165052 | <i>Drosophila simulans</i>      | adult ovaries from 3-5 day old flies | solexa | this study                   |
| GSM1165053 | <i>Drosophila simulans</i>      | adult testes from 3-5 day old flies  | solexa | this study                   |
| GSM343915  | <i>Drosophila simulans</i>      | pooled 0-12 and 12-24 hour embryos   | solexa | Berezikov <i>et al.</i> 2010 |
| GSM246085  | <i>Drosophila simulans</i>      | adult male heads                     | 454    | Lu <i>et al.</i> 2008        |
| GSM1165054 | <i>Drosophila pseudoobscura</i> | adult ovaries from 3-5 day old flies | solexa | this study                   |
| GSM1165055 | <i>Drosophila pseudoobscura</i> | adult testes from 3-5 day old flies  | solexa | this study                   |
| GSM1165056 | <i>Drosophila pseudoobscura</i> | larval brains and imaginal discs     | solexa | this study                   |
| GSM343916  | <i>Drosophila pseudoobscura</i> | pooled 0-12 and 12-24 hour embryos   | solexa | Berezikov <i>et al.</i> 2010 |
| GSM444067  | <i>Drosophila pseudoobscura</i> | head                                 | solexa | Berezikov <i>et al.</i> 2010 |
| GSM246086  | <i>Drosophila pseudoobscura</i> | adult male heads                     | 454    | Lu <i>et al.</i> 2008        |
| GSM548599  | <i>Drosophila virilis</i>       | testes from Argentina strain         | solexa | Rozhkov <i>et al.</i> 2010   |
| GSM548600  | <i>Drosophila virilis</i>       | ovaries from Argentina strain        | solexa | Rozhkov <i>et al.</i> 2010   |
| GSM548603  | <i>Drosophila virilis</i>       | 0-2hr embryos from 160 strain        | solexa | Rozhkov <i>et al.</i> 2010   |
| GSM548610  | <i>Drosophila virilis</i>       | testes from 9 strain                 | solexa | Rozhkov <i>et al.</i> 2010   |
| GSM548613  | <i>Drosophila virilis</i>       | ovaries from 9 strain                | solexa | Rozhkov <i>et al.</i> 2010   |
| GSM548623  | <i>Drosophila virilis</i>       | testes from 160 strain               | solexa | Rozhkov <i>et al.</i> 2010   |
| GSM548627  | <i>Drosophila virilis</i>       | 0-2hr embryos from 9 strain          | solexa | Rozhkov <i>et al.</i> 2010   |
| GSM548628  | <i>Drosophila virilis</i>       | ovaries from 160 strain              | solexa | Rozhkov <i>et al.</i> 2010   |
