# Supplementary material for: New MicroRNAs in Drosophila—Birth, Death and Cycles of Adaptive Evolution
Source: PLOS journal article supplement (doi:10.1371/journal.pgen.1004096), 2014-01-23
Supplement: S8 (10.1371/journal.pgen.1004096.s008) [file journal.pgen.1004096.s008.pdf › journal.pgen.1004096.s008.pdf]

**Table S3. miRNAs clustered in miR-982s, miR-310s, and miR-972s in *D. melanogaster*.**

| cluster  | miRNA         | age           |
|----------|---------------|---------------|
| miR-982s | dme-miR-984   | 0 - 4 Myrs    |
|          | dme-miR-983-2 | 0 - 4 Myrs    |
|          | dme-miR-983-1 | 4 - 30 Myrs   |
|          | dme-miR-303   | 4 - 30 Myrs   |
|          | dme-miR-982   | 4 - 30 Myrs   |
| miR-310s | dme-miR-992   | 4 - 30 Myrs   |
|          | dme-miR-991   | 30 - 60 Myrs  |
|          | dme-miR-2498  | 4 - 30 Myrs   |
|          | dme-miR-313   | 60 - 250 Myrs |
|          | dme-miR-312   | 30 - 60 Myrs  |
|          | dme-miR-311   | 60 - 250 Myrs |
|          | dme-miR-310   | 60 - 250 Myrs |
| miR-972s | dme-miR-972   | 4 - 30 Myrs   |
|          | dme-miR-973   | 60 - 250 Myrs |
|          | dme-miR-974   | 60 - 250 Myrs |
|          | dme-miR-2499  | 4 - 30 Myrs   |
|          | dme-miR-4966  | 0 - 4 Myrs    |
|          | dme-miR-975   | 60 - 250 Myrs |
|          | dme-miR-976   | 60 - 250 Myrs |
|          | dme-miR-977   | 60 - 250 Myrs |
|          | dme-miR-978   | 4 - 30 Myrs   |
|          | dme-miR-979   | 0 - 4 Myrs    |
