# Supplementary material for: New MicroRNAs in Drosophila—Birth, Death and Cycles of Adaptive Evolution
Source: PLOS journal article supplement (doi:10.1371/journal.pgen.1004096), 2014-01-23
Supplement: S9 (10.1371/journal.pgen.1004096.s009) [file journal.pgen.1004096.s009.pdf › journal.pgen.1004096.s009.pdf]

**Table S4. Fly strains used for population sequencing of the miR-982s cluster.**

| ID                           | Origin                     |
|------------------------------|----------------------------|
| <i>D.melanogaster</i> M line |                            |
| mm1                          | North Carolina, USA        |
| mm17                         | North Carolina, USA        |
| mm131                        | North Carolina, USA        |
| mm140                        | North Carolina, USA        |
| M-97                         | Miami, USA                 |
| M-103                        | Miami, USA                 |
| Floral city#13               | Florida, USA               |
| Oahu                         | Oahu, Hawaii               |
| CanS, Canton, OH             | Canton, Ohio, USA          |
| Ica                          | Peru                       |
| EC158                        | Ecuador                    |
| EC175                        | Ecuador                    |
| FrV2-1                       | France                     |
| FrV3-1                       | France                     |
| HB99                         | Australia                  |
| FR8                          | Australia                  |
| Yv101                        | Australia                  |
| SFS2-11                      | Israel                     |
| SFS2-15                      | Israel                     |
| NFS6-3                       | Israel                     |
| NFS6-7                       | Israel                     |
| NFS6-10                      | Israel                     |
| Hg84(2)                      | Highgrove, California, USA |
| Hg84(3)                      | Highgrove, California, USA |
| India female weak Mysore     | India                      |
| QD-12                        | Japan                      |
| QD-18                        | Japan                      |
| TWN-9                        | Taiwan                     |
| TWN-38                       | Taiwan                     |
| <i>D.melanogaster</i> Z line |                            |
| Zs2                          | Sangawa, Zimbabwe          |
| Zs8                          | Sangawa, Zimbabwe          |
| Zs11                         | Sangawa, Zimbabwe          |
| Zs30(xz)                     | Sangawa, Zimbabwe          |
| Zs53(xz)                     | Sangawa, Zimbabwe          |
| Zs56                         | Sangawa, Zimbabwe          |
| ZH12                         | Harare, Zimbabwe           |
| ZH16                         | Harare, Zimbabwe           |
| ZH18                         | Harare, Zimbabwe           |

|                       |                       |
|-----------------------|-----------------------|
| ZH21                  | Harare, Zimbabwe      |
| ZH34                  | Harare, Zimbabwe      |
| mw28                  | Malawi, Africa        |
| mw56                  | Malawi, Africa        |
| <i>D.simulans</i>     |                       |
| Davis, CA             | Davis, CA             |
| Morro Bay, CA         | Morro Bay, CA         |
| Floral City, FL       | Floral City, FL       |
| Latana, FL            | Latana, FL            |
| Hawaii                | Hawaii                |
| CookIS, Pacific Ocean | CookIS, Pacific Ocean |
| Reunion, Indian Ocean | Reunion, Indian Ocean |
| Arimiddle Woods, Aus  | Australia             |
| Canner Rive, Aus      | Australia             |
| Eden32, Aus           | Australia             |
| Kyogle4, Aus          | Australia             |
| Morya2, Aus           | Australia             |
| N.Caled48s            | Australia             |
| New Guinea            | New Guinea            |
| Lima                  | Lima, Peru            |
| Tamiaguadala          | Tamiaguadala, Mexico  |
| Trinidad              | Trinidad              |
| W54                   | France                |
| W60                   | Mishima Japan         |
| W62                   | Ogasawana Japan       |
| W89                   | Kenya                 |
| W81                   | Madagascar            |
| Sim6                  | -                     |
| C167.4                | -                     |
| MD106TS               | -                     |
