# Supplementary material for: New MicroRNAs in Drosophila—Birth, Death and Cycles of Adaptive Evolution
Source: PLOS journal article supplement (doi:10.1371/journal.pgen.1004096), 2014-01-23
Supplement: S10 (10.1371/journal.pgen.1004096.s010) [file journal.pgen.1004096.s010.pdf › journal.pgen.1004096.s010.pdf]

**Table S5. Estimates of proportions of different classes of miRNA genes under positive selection.** Both canonical miRNAs and mirtrons from different age groups were classified into two subgroups according to their expression levels: low ( $\leq 200$  RPM) and high ( $>200$  PRM). The number of genes in each category is given in the parentheses. D, divergence between *D. melanogaster* and *D. simulans*; P, polymorphism in populations of *D. melanogaster* (DPGP); DAF, derived allele frequency;  $\alpha$ , the fraction of adaptive fixations; b, the fraction of new mutants that are weakly deleterious; d, the fraction of new mutants that are strongly deleterious; f, the expected number of neutral segregating sites.

| Site type               |           | Site number | D       | P<br>(DAF>5%) | P<br>(DAF<5%) | $\alpha$ (%) | b (%)   | d (%)   | f (%)   |
|-------------------------|-----------|-------------|---------|---------------|---------------|--------------|---------|---------|---------|
| 4-fold degenerate sites |           | 3,495,672   | 378,361 | 83,996        | 84,983        |              |         |         |         |
| canonical miRNAs        |           |             |         |               |               |              |         |         |         |
| 0-4<br>Myrs             | low (60)  | 5,692       | 271     | 48            | 137           | -15.3        | 15.4    | 33.9    | 50.7    |
|                         | high (12) | 1,118       | 86      | 4             | 4             | 79.1         | 0.0     | 6.1     | 14.8    |
| 4-30<br>Myrs            | low (2)   | 192         | 8       | 1             | 3             | (n. a.)      | (n. a.) | (n. a.) | (n. a.) |
|                         | high (10) | 944         | 110     | 3             | 6             | 84.7         | 3.2     | -4.4    | 16.5    |
| 30-60<br>Myrs           | low (3)   | 287         | 3       | 1             | 0             | (n. a.)      | (n. a.) | (n. a.) | (n. a.) |
|                         | high (9)  | 800         | 35      | 12            | 7             | -12.2        | -3.6    | 82.2    | 10.8    |
| 60-250<br>Myrs          | low (3)   | 190         | 4       | 3             | 4             | (n. a.)      | (n. a.) | (n. a.) | (n. a.) |
|                         | high (34) | 2,931       | 114     | 14            | 23            | 36.0         | 3.1     | 37.9    | 23.0    |
| >250<br>Myrs            | low (0)   | 0           | 0       | 0             | 0             | (n. a.)      | (n. a.) | (n. a.) | (n. a.) |
|                         | high (71) | 6,355       | 72      | 18            | 42            | -49.8        | 3.8     | 80.5    | 15.7    |
| mirtrons                |           |             |         |               |               |              |         |         |         |
| 0-4<br>Myrs             | low (21)  | 1,372       | 105     | 13            | 24            | 32.6         | 8.1     | 11.6    | 47.7    |
|                         | high (3)  | 355         | 11      | 9             | 5             | -199.3       | -21.2   | -4.5    | 125.7   |
| 4-30<br>Myrs            | low (3)   | 176         | 2       | 1             | 6             | (n. a.)      | (n. a.) | (n. a.) | (n. a.) |
|                         | high (2)  | 116         | 2       | 1             | 1             | (n. a.)      | (n. a.) | (n. a.) | (n. a.) |
| 30-60<br>Myrs           | low (1)   | 71          | 2       | 0             | 1             | (n. a.)      | (n. a.) | (n. a.) | (n. a.) |
|                         | high (1)  | 68          | 0       | 2             | 1             | (n. a.)      | (n. a.) | (n. a.) | (n. a.) |
| 60-250<br>Myrs          | low (0)   | 0           | 0       | 0             | 0             | (n. a.)      | (n. a.) | (n. a.) | (n. a.) |
|                         | high (3)  | 191         | 0       | 3             | 4             | (n. a.)      | (n. a.) | (n. a.) | (n. a.) |
| >250<br>Myrs            | low (0)   | 0           | 0       | 0             | 0             | (n. a.)      | (n. a.) | (n. a.) | (n. a.) |
|                         | high (0)  | 0           | 0       | 0             | 0             | (n. a.)      | (n. a.) | (n. a.) | (n. a.) |
