# Supplementary material for: New MicroRNAs in Drosophila—Birth, Death and Cycles of Adaptive Evolution
Source: PLOS journal article supplement (doi:10.1371/journal.pgen.1004096), 2014-01-23
Supplement: S11 (10.1371/journal.pgen.1004096.s011) [file journal.pgen.1004096.s011.pdf › journal.pgen.1004096.s011.pdf]

**Table S6. Fst of each miRNA from miR-982s between M-line and Z-line**

| <b>miRNA</b>  | <b>Fst</b> |
|---------------|------------|
| dme-miR-984   | 0.318      |
| dme-miR-983-2 | 0.0615     |
| dme-miR-983-1 | 0.0189     |
| dme-miR-303   | 0.252      |
| dme-miR-982   | 0.000      |
