# Supplementary material for: New MicroRNAs in Drosophila—Birth, Death and Cycles of Adaptive Evolution
Source: PLOS journal article supplement (doi:10.1371/journal.pgen.1004096), 2014-01-23
Supplement: S12 (10.1371/journal.pgen.1004096.s012) [file journal.pgen.1004096.s012.pdf › journal.pgen.1004096.s012.pdf]

**Table S7.  $K_{\text{miR}}$  /  $K_s$  of the older miRNAs (60-250 Myrs) that have been evolving rapidly between *D. melanogaster* and *D. simulans*.** The common ancestral sequences of *D. melanogaster* and *D. simulans* are inferred from *D. yakuba* and *D. erecta*.

| miRNA       | $K_{\text{miR}}$ / $K_s$<br>( <i>D. mel</i> vs the common ancestor<br>of <i>D. mel</i> and <i>D. sim</i> ) | $K_{\text{miR}}$ / $K_s$<br>( <i>D. sim</i> vs the common ancestor<br>of <i>D. mel</i> and <i>D. sim</i> ) |
|-------------|------------------------------------------------------------------------------------------------------------|------------------------------------------------------------------------------------------------------------|
| dme-mir-311 | 0.814                                                                                                      | 0.194                                                                                                      |
| dme-mir-313 | 0.475                                                                                                      | 1.231                                                                                                      |
| dme-mir-964 | 0.680                                                                                                      | 0.140                                                                                                      |
| dme-mir-973 | 0.511                                                                                                      | 1.676                                                                                                      |
| dme-mir-974 | 0.676                                                                                                      | 0.862                                                                                                      |
| dme-mir-975 | 0.184                                                                                                      | 0.943                                                                                                      |
| dme-mir-976 | 0.346                                                                                                      | 0.743                                                                                                      |
| dme-mir-977 | 0.687                                                                                                      | 1.290                                                                                                      |
