# Supplementary material for: New MicroRNAs in Drosophila—Birth, Death and Cycles of Adaptive Evolution
Source: PLOS journal article supplement (doi:10.1371/journal.pgen.1004096), 2014-01-23
Supplement: S13 (10.1371/journal.pgen.1004096.s013) [file journal.pgen.1004096.s013.pdf › journal.pgen.1004096.s013.pdf]

**Table S8. Age and evolutionary mode of the 136 highly expressed, canonical miRNAs analyzed in this study.**

| <b>miRNA</b>  | <b>Age</b>    | <b>Evolutionary mode</b> |
|---------------|---------------|--------------------------|
| dme-mir-1017  | 0 - 4 Myrs    | adaptive                 |
| dme-mir-2279  | 0 - 4 Myrs    | adaptive                 |
| dme-mir-4966  | 0 - 4 Myrs    | adaptive                 |
| dme-mir-954   | 0 - 4 Myrs    | adaptive                 |
| dme-mir-956   | 0 - 4 Myrs    | adaptive                 |
| dme-mir-971   | 0 - 4 Myrs    | adaptive                 |
| dme-mir-979   | 0 - 4 Myrs    | adaptive                 |
| dme-mir-983-2 | 0 - 4 Myrs    | adaptive                 |
| dme-mir-984   | 0 - 4 Myrs    | adaptive                 |
| dme-mir-985   | 0 - 4 Myrs    | adaptive                 |
| dme-mir-990   | 0 - 4 Myrs    | adaptive                 |
| dme-mir-997   | 0 - 4 Myrs    | adaptive                 |
| dme-mir-1001  | 4 - 30 Myrs   | adaptive                 |
| dme-mir-2494  | 4 - 30 Myrs   | adaptive                 |
| dme-mir-2498  | 4 - 30 Myrs   | adaptive                 |
| dme-mir-2499  | 4 - 30 Myrs   | adaptive                 |
| dme-mir-303   | 4 - 30 Myrs   | adaptive                 |
| dme-mir-972   | 4 - 30 Myrs   | adaptive                 |
| dme-mir-978   | 4 - 30 Myrs   | adaptive                 |
| dme-mir-982   | 4 - 30 Myrs   | adaptive                 |
| dme-mir-983-1 | 4 - 30 Myrs   | adaptive                 |
| dme-mir-992   | 4 - 30 Myrs   | adaptive                 |
| dme-mir-1002  | 30 - 60 Myrs  | conservative             |
| dme-mir-2b-1  | 30 - 60 Myrs  | conservative             |
| dme-mir-312   | 30 - 60 Myrs  | transitional             |
| dme-mir-959   | 30 - 60 Myrs  | conservative             |
| dme-mir-960   | 30 - 60 Myrs  | conservative             |
| dme-mir-961   | 30 - 60 Myrs  | transitional             |
| dme-mir-968   | 30 - 60 Myrs  | conservative             |
| dme-mir-986   | 30 - 60 Myrs  | conservative             |
| dme-mir-991   | 30 - 60 Myrs  | transitional             |
| dme-mir-13b-2 | 60 - 250 Myrs | conservative             |
| dme-mir-274   | 60 - 250 Myrs | conservative             |
| dme-mir-281-2 | 60 - 250 Myrs | conservative             |
| dme-mir-284   | 60 - 250 Myrs | conservative             |
| dme-mir-2a-2  | 60 - 250 Myrs | conservative             |
| dme-mir-304   | 60 - 250 Myrs | conservative             |
| dme-mir-309   | 60 - 250 Myrs | conservative             |

|               |               |              |
|---------------|---------------|--------------|
| dme-mir-310   | 60 - 250 Myrs | conservative |
| dme-mir-311   | 60 - 250 Myrs | transitional |
| dme-mir-313   | 60 - 250 Myrs | transitional |
| dme-mir-314   | 60 - 250 Myrs | conservative |
| dme-mir-318   | 60 - 250 Myrs | conservative |
| dme-mir-31b   | 60 - 250 Myrs | conservative |
| dme-mir-33    | 60 - 250 Myrs | conservative |
| dme-mir-4     | 60 - 250 Myrs | conservative |
| dme-mir-5     | 60 - 250 Myrs | conservative |
| dme-mir-6-1   | 60 - 250 Myrs | conservative |
| dme-mir-6-2   | 60 - 250 Myrs | conservative |
| dme-mir-6-3   | 60 - 250 Myrs | conservative |
| dme-mir-955   | 60 - 250 Myrs | conservative |
| dme-mir-958   | 60 - 250 Myrs | conservative |
| dme-mir-962   | 60 - 250 Myrs | conservative |
| dme-mir-963   | 60 - 250 Myrs | conservative |
| dme-mir-964   | 60 - 250 Myrs | transitional |
| dme-mir-969   | 60 - 250 Myrs | conservative |
| dme-mir-973   | 60 - 250 Myrs | adaptive     |
| dme-mir-974   | 60 - 250 Myrs | adaptive     |
| dme-mir-975   | 60 - 250 Myrs | adaptive     |
| dme-mir-976   | 60 - 250 Myrs | adaptive     |
| dme-mir-977   | 60 - 250 Myrs | transitional |
| dme-mir-980   | 60 - 250 Myrs | conservative |
| dme-mir-987   | 60 - 250 Myrs | conservative |
| dme-mir-994   | 60 - 250 Myrs | conservative |
| dme-mir-995   | 60 - 250 Myrs | conservative |
| dme-bantam    | > 250 Myrs    | conservative |
| dme-let-7     | > 250 Myrs    | conservative |
| dme-mir-1     | > 250 Myrs    | conservative |
| dme-mir-10    | > 250 Myrs    | conservative |
| dme-mir-100   | > 250 Myrs    | conservative |
| dme-mir-1000  | > 250 Myrs    | conservative |
| dme-mir-11    | > 250 Myrs    | conservative |
| dme-mir-12    | > 250 Myrs    | conservative |
| dme-mir-124   | > 250 Myrs    | conservative |
| dme-mir-125   | > 250 Myrs    | conservative |
| dme-mir-133   | > 250 Myrs    | conservative |
| dme-mir-137   | > 250 Myrs    | conservative |
| dme-mir-13a   | > 250 Myrs    | conservative |
| dme-mir-13b-1 | > 250 Myrs    | conservative |
| dme-mir-14    | > 250 Myrs    | conservative |
| dme-mir-184   | > 250 Myrs    | conservative |

|               |            |              |
|---------------|------------|--------------|
| dme-mir-190   | > 250 Myrs | conservative |
| dme-mir-193   | > 250 Myrs | conservative |
| dme-mir-210   | > 250 Myrs | conservative |
| dme-mir-219   | > 250 Myrs | conservative |
| dme-mir-252   | > 250 Myrs | conservative |
| dme-mir-263a  | > 250 Myrs | conservative |
| dme-mir-263b  | > 250 Myrs | conservative |
| dme-mir-275   | > 250 Myrs | conservative |
| dme-mir-276a  | > 250 Myrs | conservative |
| dme-mir-276b  | > 250 Myrs | conservative |
| dme-mir-277   | > 250 Myrs | conservative |
| dme-mir-278   | > 250 Myrs | conservative |
| dme-mir-279   | > 250 Myrs | conservative |
| dme-mir-281-1 | > 250 Myrs | conservative |
| dme-mir-282   | > 250 Myrs | conservative |
| dme-mir-283   | > 250 Myrs | conservative |
| dme-mir-285   | > 250 Myrs | conservative |
| dme-mir-286   | > 250 Myrs | conservative |
| dme-mir-2a-1  | > 250 Myrs | conservative |
| dme-mir-2b-2  | > 250 Myrs | conservative |
| dme-mir-2c    | > 250 Myrs | conservative |
| dme-mir-3     | > 250 Myrs | conservative |
| dme-mir-305   | > 250 Myrs | conservative |
| dme-mir-306   | > 250 Myrs | conservative |
| dme-mir-307a  | > 250 Myrs | conservative |
| dme-mir-308   | > 250 Myrs | conservative |
| dme-mir-315   | > 250 Myrs | conservative |
| dme-mir-316   | > 250 Myrs | conservative |
| dme-mir-317   | > 250 Myrs | conservative |
| dme-mir-31a   | > 250 Myrs | conservative |
| dme-mir-34    | > 250 Myrs | conservative |
| dme-mir-375   | > 250 Myrs | conservative |
| dme-mir-7     | > 250 Myrs | conservative |
| dme-mir-79    | > 250 Myrs | conservative |
| dme-mir-8     | > 250 Myrs | conservative |
| dme-mir-87    | > 250 Myrs | conservative |
| dme-mir-927   | > 250 Myrs | conservative |
| dme-mir-929   | > 250 Myrs | conservative |
| dme-mir-92a   | > 250 Myrs | conservative |
| dme-mir-92b   | > 250 Myrs | conservative |
| dme-mir-932   | > 250 Myrs | conservative |
| dme-mir-957   | > 250 Myrs | conservative |
| dme-mir-965   | > 250 Myrs | conservative |

|               |            |              |
|---------------|------------|--------------|
| dme-mir-970   | > 250 Myrs | conservative |
| dme-mir-981   | > 250 Myrs | conservative |
| dme-mir-988   | > 250 Myrs | conservative |
| dme-mir-989   | > 250 Myrs | conservative |
| dme-mir-993   | > 250 Myrs | conservative |
| dme-mir-996   | > 250 Myrs | conservative |
| dme-mir-998   | > 250 Myrs | conservative |
| dme-mir-999   | > 250 Myrs | conservative |
| dme-mir-9a    | > 250 Myrs | conservative |
| dme-mir-9b    | > 250 Myrs | conservative |
| dme-mir-9c    | > 250 Myrs | conservative |
| dme-mir-iab-4 | > 250 Myrs | conservative |
