# Supplementary material for: New MicroRNAs in Drosophila—Birth, Death and Cycles of Adaptive Evolution
Source: PLOS journal article supplement (doi:10.1371/journal.pgen.1004096), 2014-01-23
Supplement: S14 (10.1371/journal.pgen.1004096.s014) [file journal.pgen.1004096.s014.pdf › journal.pgen.1004096.s014.pdf]

**Table S9. GO enrichment of predicted target genes of miR-982s in *D. melanogaster* and *D. simulans*.** Targets were predicted by seed match using TargetScan (v5.0 [http://www.targetscan.org/fly\\_12/](http://www.targetscan.org/fly_12/))

*D. melanogaster*

| Term                                                                             | P-value     | Fold Enrichment |
|----------------------------------------------------------------------------------|-------------|-----------------|
| GO:0048580~regulation of post-embryonic development                              | 0.025907537 | 11.12663551     |
| GO:0040034~regulation of development, heterochronic                              | 0.018457496 | 6.743415463     |
| GO:0007584~response to nutrient                                                  | 0.005369981 | 6.62299733      |
| GO:0048065~male courtship behavior, veined wing extension                        | 0.02953808  | 5.70596693      |
| GO:0045197~establishment or maintenance of epithelial cell apical/basal polarity | 0.02013444  | 4.636098131     |
| GO:0009991~response to extracellular stimulus                                    | 0.009563521 | 4.450654206     |
| GO:0031667~response to nutrient levels                                           | 0.009563521 | 4.450654206     |
| GO:0007030~Golgi organization                                                    | 0.023843144 | 4.415331553     |
| GO:0016203~muscle attachment                                                     | 0.037313864 | 3.863415109     |
| GO:0007530~sex determination                                                     | 0.042599643 | 3.708878505     |
| GO:0035088~establishment or maintenance of apical/basal cell polarity            | 0.048285081 | 3.566229331     |
| GO:0006576~biogenic amine metabolic process                                      | 0.037717021 | 3.179038718     |
| GO:0009309~amine biosynthetic process                                            | 0.038820176 | 2.761930801     |
| GO:0045664~regulation of neuron differentiation                                  | 0.02468091  | 2.747317411     |
| GO:0050767~regulation of neurogenesis                                            | 0.02649637  | 2.491037802     |
| GO:0016311~dephosphorylation                                                     | 0.013843041 | 2.211716539     |
| GO:0051056~regulation of small GTPase mediated signal transduction               | 0.029073381 | 2.170088487     |
| GO:0042048~olfactory behavior                                                    | 0.031001251 | 2.14724545      |
| GO:0007422~peripheral nervous system development                                 | 0.046243933 | 2.107317332     |
| GO:0007635~chemosensory behavior                                                 | 0.03395266  | 2.023024639     |

*D. simulans*

| Term                                                                                | P-value     | Fold Enrichment |
|-------------------------------------------------------------------------------------|-------------|-----------------|
| GO:0042387~plasmotocyte differentiation                                             | 0.027146793 | 4.998110831     |
| GO:0035209~pupal development                                                        | 0.027146793 | 4.998110831     |
| GO:0007432~salivary gland boundary specification                                    | 9.79E-07    | 4.331696054     |
| GO:0007451~dorsal/ventral lineage restriction, imaginal disc                        | 0.016905841 | 4.165092359     |
| GO:0046667~compound eye retinal cell programmed cell death                          | 0.016905841 | 4.165092359     |
| GO:0006898~receptor-mediated endocytosis                                            | 8.56E-04    | 3.998488665     |
| GO:0070304~positive regulation of stress-activated protein kinase signaling pathway | 0.003044561 | 3.887419535     |
| GO:0043410~positive regulation of MAPKKK cascade                                    | 0.003044561 | 3.887419535     |
| GO:0046330~positive regulation of JNK cascade                                       | 0.003044561 | 3.887419535     |
| GO:0010740~positive regulation of protein kinase cascade                            | 0.001947101 | 3.634989695     |

|                                                            |             |             |
|------------------------------------------------------------|-------------|-------------|
| GO:0042133~neurotransmitter metabolic process              | 0.033250101 | 3.570079165 |
| GO:0035073~pupariation                                     | 0.033250101 | 3.570079165 |
| GO:0043112~receptor metabolic process                      | 0.033250101 | 3.570079165 |
| GO:0042688~crystal cell differentiation                    | 0.033250101 | 3.570079165 |
| GO:0035111~leg joint morphogenesis                         | 0.003869515 | 3.332073887 |
| GO:0022407~regulation of cell-cell adhesion                | 0.019498262 | 3.332073887 |
| GO:0007041~lysosomal transport                             | 0.002370883 | 3.213071249 |
| GO:0040034~regulation of development, heterochronic        | 0.011584705 | 3.180615984 |
| GO:0007034~vacuolar transport                              | 8.96E-04    | 3.054401064 |
| GO:0048645~organ formation                                 | 1.85E-07    | 2.998866499 |
| GO:0035078~induction of programmed cell death by ecdysone  | 0.032668694 | 2.998866499 |
| GO:0035161~imaginal disc lineage restriction               | 0.032668694 | 2.998866499 |
| GO:0048859~formation of anatomical boundary                | 7.47E-08    | 2.953429128 |
| GO:0007416~synaptogenesis                                  | 3.41E-04    | 2.953429128 |
| GO:0035285~appendage segmentation                          | 0.00254843  | 2.940065195 |
| GO:0035286~leg segmentation                                | 0.00254843  | 2.940065195 |
| GO:0010160~formation of organ boundary                     | 1.56E-06    | 2.893643113 |
| GO:0007370~ventral furrow formation                        | 0.011524722 | 2.856063332 |
| GO:0007479~leg disc proximal/distal pattern formation      | 0.006936849 | 2.811437343 |
| GO:0035223~leg disc pattern formation                      | 0.006936849 | 2.811437343 |
| GO:0050770~regulation of axonogenesis                      | 0.004201044 | 2.77672824  |
| GO:0042386~hemocyte differentiation                        | 0.004201044 | 2.77672824  |
| GO:0007427~epithelial cell migration, open tracheal system | 1.37E-04    | 2.75757839  |
| GO:0010631~epithelial cell migration                       | 1.37E-04    | 2.75757839  |
| GO:0045610~regulation of hemocyte differentiation          | 0.001561972 | 2.726242272 |
| GO:0001710~mesodermal cell fate commitment                 | 0.017937059 | 2.66565911  |
| GO:0048333~mesodermal cell differentiation                 | 0.017937059 | 2.66565911  |
| GO:0001667~ameboidal cell migration                        | 1.38E-04    | 2.655246379 |
| GO:0048584~positive regulation of response to stimulus     | 0.010837665 | 2.646058675 |
| GO:0035050~embryonic heart tube development                | 0.010837665 | 2.646058675 |
| GO:0007016~cytoskeletal anchoring at plasma membrane       | 0.010837665 | 2.646058675 |
| GO:0048741~skeletal muscle fiber development               | 0.002458278 | 2.607709999 |
| GO:0007528~neuromuscular junction development              | 0.002458278 | 2.607709999 |
| GO:0035110~leg morphogenesis                               | 5.23E-05    | 2.56313376  |
| GO:0050808~synapse organization                            | 5.05E-05    | 2.499055416 |
| GO:0001763~morphogenesis of a branching structure          | 5.05E-05    | 2.499055416 |
| GO:0035108~limb morphogenesis                              | 8.11E-05    | 2.499055416 |
| GO:0060173~limb development                                | 8.11E-05    | 2.499055416 |
| GO:0031344~regulation of cell projection organization      | 1.30E-04    | 2.499055416 |
| GO:0010975~regulation of neuron projection development     | 8.78E-04    | 2.499055416 |
| GO:0010769~regulation of cell morphogenesis involved in    | 8.78E-04    | 2.499055416 |

|                                                                   |             |             |
|-------------------------------------------------------------------|-------------|-------------|
| differentiation                                                   |             |             |
| GO:0008345~larval locomotory behavior                             | 0.026492778 | 2.499055416 |
| GO:0035146~tube fusion                                            | 0.026492778 | 2.499055416 |
| GO:0035147~branch fusion, open tracheal system                    | 0.026492778 | 2.499055416 |
| GO:0030239~myofibril assembly                                     | 0.043659414 | 2.499055416 |
| GO:0032012~regulation of ARF protein signal transduction          | 0.043659414 | 2.499055416 |
| GO:0055001~muscle cell development                                | 4.79E-05    | 2.443520851 |
| GO:0055002~striated muscle cell development                       | 4.79E-05    | 2.443520851 |
| GO:0048754~branching morphogenesis of a tube                      | 1.97E-04    | 2.434977072 |
| GO:0060446~branching involved in open tracheal system development | 1.97E-04    | 2.434977072 |
| GO:0048747~muscle fiber development                               | 0.00131031  | 2.418440725 |
| GO:0007480~imaginal disc-derived leg morphogenesis                | 0.002107887 | 2.412881091 |
| GO:0035127~post-embryonic limb morphogenesis                      | 0.002107887 | 2.412881091 |
| GO:0048332~mesoderm morphogenesis                                 | 0.003394287 | 2.406497808 |
| GO:0007469~antennal development                                   | 0.008831534 | 2.390400832 |
| GO:0060562~epithelial tube morphogenesis                          | 1.83E-04    | 2.380052777 |
| GO:0007449~proximal/distal pattern formation, imaginal disc       | 0.014273482 | 2.380052777 |
| GO:0035162~embryonic hemopoiesis                                  | 0.023102581 | 2.367526183 |
| GO:0035218~leg disc development                                   | 4.17E-05    | 2.352052156 |
| GO:0007303~cytoplasmic transport, nurse cell to oocyte            | 0.037451356 | 2.352052156 |
| GO:0035109~imaginal disc-derived limb morphogenesis               | 0.003048077 | 2.332451721 |
| GO:0001707~mesoderm formation                                     | 0.007798783 | 2.306820384 |
| GO:0016203~muscle attachment                                      | 0.01247673  | 2.290800798 |
| GO:0007478~leg disc morphogenesis                                 | 0.004303132 | 2.257211343 |
| GO:0008593~regulation of Notch signaling pathway                  | 0.01714671  | 2.199168766 |
| GO:0060537~muscle tissue development                              | 0.001336273 | 2.19429256  |
| GO:0016055~Wnt receptor signaling pathway                         | 1.46E-05    | 2.182273743 |
| GO:0048545~response to steroid hormone stimulus                   | 0.027112957 | 2.173091666 |
| GO:0009954~proximal/distal pattern formation                      | 0.027112957 | 2.173091666 |
| GO:0035075~response to ecdysone                                   | 0.027112957 | 2.173091666 |
| GO:0008406~gonad development                                      | 0.009348848 | 2.165848027 |
| GO:0048608~reproductive structure development                     | 0.009348848 | 2.165848027 |
| GO:0032318~regulation of Ras GTPase activity                      | 0.005150012 | 2.142047499 |
| GO:0007519~skeletal muscle tissue development                     | 0.005150012 | 2.142047499 |
| GO:0007494~midgut development                                     | 0.014677979 | 2.142047499 |
| GO:0016339~calcium-dependent cell-cell adhesion                   | 0.042778473 | 2.142047499 |
| GO:0048568~embryonic organ development                            | 0.042778473 | 2.142047499 |
| GO:0045664~regulation of neuron differentiation                   | 3.71E-04    | 2.128824984 |
| GO:0014706~striated muscle tissue development                     | 0.00285835  | 2.124197103 |
| GO:0032483~regulation of Rab protein signal transduction          | 0.022989164 | 2.114585352 |
| GO:0032313~regulation of Rab GTPase activity                      | 0.022989164 | 2.114585352 |

|                                                                              |             |             |
|------------------------------------------------------------------------------|-------------|-------------|
| GO:0060538~skeletal muscle organ development                                 | 3.25E-04    | 2.104467718 |
| GO:0048190~wing disc dorsal/ventral pattern formation                        | 8.94E-04    | 2.099206549 |
| GO:0050767~regulation of neurogenesis                                        | 1.04E-04    | 2.088762735 |
| GO:0030716~oocyte fate determination                                         | 0.035894693 | 2.08254618  |
| GO:0048542~lymph gland development                                           | 0.035894693 | 2.08254618  |
| GO:0035295~tube development                                                  | 2.27E-06    | 2.069924688 |
| GO:0030952~establishment or maintenance of cytoskeleton polarity             | 0.019474859 | 2.068183792 |
| GO:0030951~establishment or maintenance of microtubule cytoskeleton polarity | 0.019474859 | 2.068183792 |
| GO:0016325~oocyte microtubule cytoskeleton organization                      | 0.019474859 | 2.068183792 |
| GO:0048565~gut development                                                   | 7.93E-05    | 2.05401815  |
| GO:0048619~embryonic hindgut morphogenesis                                   | 0.016491083 | 2.030482525 |
| GO:0035239~tube morphogenesis                                                | 3.41E-05    | 2.02304486  |
| GO:0015837~amine transport                                                   | 0.005062976 | 2.02304486  |
| GO:0001708~cell fate specification                                           | 5.05E-04    | 2.015367271 |
| GO:0007369~gastrulation                                                      | 1.62E-04    | 2.013127974 |
