# Supplementary material for: New MicroRNAs in Drosophila—Birth, Death and Cycles of Adaptive Evolution
Source: PLOS journal article supplement (doi:10.1371/journal.pgen.1004096), 2014-01-23
Supplement: S15 (10.1371/journal.pgen.1004096.s015) [file journal.pgen.1004096.s015.pdf › journal.pgen.1004096.s015.pdf]

**Table S10. PCR primers of the miR-982s cluster.**

| Primer                                                   | Sequence (5'-3')        |
|----------------------------------------------------------|-------------------------|
| cDNA PCR primers for <i>D. yakuba</i>                    |                         |
| dya-miR-2582-anc-F                                       | TTCTTGGAAGCAGTCCTAAA    |
| dya-miR-2582-anc-R                                       | GAACAAAATGACAGTGCCTT    |
| dya-miR-303-anc-F                                        | ACGATGCGAAATAATGCTGA    |
| dya-miR-303-anc-R                                        | ACAACCACATGGGACCAAA     |
| cDNA PCR primers for <i>D. erecta</i>                    |                         |
| der-miR-982-anc-F                                        | TTCGCAAGAAACCAAATG      |
| der-miR-982-anc-R                                        | AATGAAATGGTTTTAGTGCTG   |
| der-miR-983-anc-F                                        | CTACCCGCAACTCAAGGA      |
| der-miR-983-anc-R                                        | TCGATTCTGAAGTTATGTGCT   |
| Population sequencing primers for <i>D. melanogaster</i> |                         |
| dme-miR-982s-F1                                          | TAACCAACGCCTACGACTAT    |
| dme-miR-982s-R1                                          | TCTAACATTTGGGCTCATTT    |
| dme-miR-982s-F2                                          | AGCCTCATATCACCGCTGTC    |
| dme-miR-982s-R2                                          | GAAACTGCATTCCCCGAACG    |
| dme-miR-982s-F3                                          | CAATGGCGTAAATGGTTGTG    |
| dme-miR-982s-R3                                          | CGTGTGCAAATAGTGGTGCT    |
| dme-miR-982s-F4                                          | TGCCATCAAGAAGATTCACAGCG |
| dme-miR-982s-R4                                          | CGCTGTGAATCTTCTTGATGGCA |
| dme-miR-982s-F5                                          | AAGCCATTCCCATTCACTCAC   |
| dme-miR-982s-R5                                          | AGACACCGACCACAGTAGC     |
| Population sequencing primers for <i>D. simulans</i>     |                         |
| dsi-miR-982s-F1                                          | AATGTGCCAATCCCAATGTT    |
| dsi-miR-982s-R1                                          | ATTTACGCCCTTGAATGCAG    |
| dsi-miR-982s-F2                                          | GATGGATTGATTGATGATGGA   |
| dsi-miR-982s-R2                                          | TCATGGGACTAACCCGATTC    |
| dsi-miR-982s-F3                                          | GCCTGAATCTGGCCCGAAGT    |
| dsi-miR-982s-R3                                          | GCTGAAATAGCGAATGAGCGTCT |
| dsi-miR-982s-F4                                          | CTGCAGTACCTCTGCTCCAA    |
| dsi-miR-982s-R4                                          | AGCAACAAACAGCTGCTCAA    |
